# Supplementary material for: Identifying novel circadian rhythm biomarkers for diagnosis and prognosis of melanoma by an integrated bioinformatics and machine learning approach
Source: Aging (Albany NY). 2024 Jun 20;16(16):11824–42. doi: 10.18632/aging.205961 (PMC11386929; doi:10.18632/aging.205961)
Supplement: Supplementary Table 1 [file aging-16-205961-s001.xlsx]

## Sheet: Sheet1
Supplementary Table 1. List of 1,471 CRGs obtained from the MSigDB and Genecards databases.
CRGs Collection
CLOCK
PER2
PER3
PER1
CRY1
ARNTL
CRY2
TIMELESS
NPAS2
ARNTL2
CIPC
CSNK1D
NR1D1
CSNK1E
CIART
BHLHE40
BHLHE41
RORA
DBP
PASD1
NOCT
AANAT
NR1D2
FBXL3
SIRT1
NFIL3
RAI1
GSK3B
OPN4
BTRC
NR3C1
CREBBP
CSNK2A1
HDAC3
TP53
PPARA
ID2
EP300
NCOA2
CREB1
CRTC1
PROK2
PPP1CA
PPP1CB
PPP1CC
NPY
NRIP1
RORC
SERPINE1
THRAP3
MTNR1A
EZH2
RBM4
KDM2A
PPARGC1A
KMT2A
USP2
KDM5A
NONO
NAMPT
RORB
CREM
NMU
ADCYAP1
MTNR1B
AHR
PRL
CUL1
NCOR1
METTL3
MAPK8
SFPQ
KAT2B
MAGEL2
SPSB4
ID3
MTA1
PRKCG
IMPDH2
UBE3A
CDK5
HIF1A
PHLPP1
NR0B2
ID1
HCRT
VIP
SKP1
HNF4A
INS
LEP
TPTEP2-CSNK1E
DDB1
KLF10
KAT5
RBM4B
USP9X
PIWIL2
SIRT6
KLF15
IL6
TNF
MAPK10
MAPK9
SIK1
VIPR2
HUWE1
ASS1
SIAH2
SLC6A4
HCRTR2
CRH
RXRA
ESR1
USP7
GHRL
PPARG
ATF4
CSNK1A1
MTOR
OPN5
NDUFA9
POMC
CSNK2A2
DRD2
MYCBP2
ARNT
RELB
NCOA3
KLF9
NR1H2
OGT
CDK5R1
HNRNPU
MDM2
HDAC1
DPYD
PRKCA
TARDBP
MYC
NMS
GH1
FBXW11
TEF
TBL1XR1
PPP5C
PML
ADIPOQ
NGFR
KDM8
AVP
RPS27A
IL1B
TOP1
NR1I3
CCAR2
RARA
MC3R
F7
MAPK1
NFE2L2
FOS
PRKACA
MED1
TPH1
IGF1
FBXW7
UBB
HTR7
RELA
CAVIN3
SRRD
ALB
ELF3
ADA
PRMT5
ASMT
HMOX1
NR2F6
ESR2
HLF
NCOA1
PROX1
ACE
REN
NUDT12
CSNK2B
SP1
PPP2CB
PSPC1
CARM1
DNM1L
HSP90AA1
CDK1
CUL4A
DTL
EGR1
SMARCD3
HTR1A
HNRNPD
VEGFA
NCOA6
NR3C2
KPNB1
DCLK1
GNRH1
NKX2-1
GCG
SUMO3
GPR176
PSMC4
ATF2
APP
FDFT1
PDE6B
MYBBP1A
CSNK1A1L
ACADS
CLTC
PLCB4
GLO1
TIPIN
PPP2R1B
PRKDC
PRNP
SREBF1
ENOX2
SLC41A1
TBL1X
GRP
PPAT
XPO1
SPR
HAT1
RACK1
TGS1
CHD9
HELZ2
RASD1
KITLG
HBB
EPAS1
NFKB2
LRPPRC
HSPA8
DNAJA1
MAGED1
WDR5
PRKAR1A
CEBPA
BDNF
ATOH7
APOA1
VCP
FASN
YWHAE
PAICS
SIN3A
GFPT1
GNB3
DRD4
APOB
MATR3
YTHDF2
ADORA1
GPR50
EXOC1
YWHAZ
CALB1
TXN
PLAT
MEF2C
ADCY10
HERC2
CHEK1
SUMO1
EDN1
EIF2AK3
CAMK2G
RPSA
EEF2
CPNE8
FLNA
MCM3
CCT2
CCT8
HNRNPA3
HNRNPH2
CKAP4
IGFBP1
CSNK1G2
UBA52
HNRNPA1
G6PD
PPP2R1A
CCK
SENP1
PPARD
TRIM28
CTNNB1
PIWIL1
NPY5R
EGR3
CACUL1
FBXL15
RPS6
CD36
PSMD2
CPT1A
UBC
NTS
PSMC3
PSMC5
PSMD3
PSMD11
PSMC6
PSMD1
PSEN1
SYNCRIP
PDZD3
AVPR1A
MAX
MEF2D
CRTC2
CRTC3
TDRKH
RGS16
GNAQ
TH
H2BC11
SUV39H1
PRMT1
RPS19
HMGA1
RPL36
RPL39
APOE
KAT8
ADRB1
CBX3
GPI
LEPR
LOC102724428
PSME2
METTL14
COPS2
MAPK14
CS
PPP2R5D
HSPA5
ZPBP2
ADORA2A
P4HB
ALDOA
TLN1
PDIA6
HSPA1A
FOXO1
NCL
SST
CCL2
HK1
LMNA
PRKD1
PGK1
ACACA
MDH2
ENO1
HADHA
HSP90B1
NME2
PCCA
PCCB
VDAC1
CYB5R3
HNRNPA2B1
HSD17B10
NME1
PRKD3
MCCC2
MCCC1
CAPZB
ERO1A
RPE65
NGF
PIK3R1
THBD
FAM50B
CDKN3
AGT
TKT
NOS3
HSPD1
HNRNPL
GRIN2B
RPS3
SOD1
UBA1
CAND1
GABBR1
PTPA
SERPINA6
GNAS
KDM2B
GAPDH
CIRBP
ALAS1
TFRC
TIMP3
NOX4
COMT
HSP90AB1
CSE1L
CHEK2
PPP2R5E
ACTN1
KRT17
GFPT2
DDX3X
CCT5
PKM
GSN
ACTN4
MYH14
DDOST
FLNC
EZR
KRT6A
PLEC
CCT7
SSB
RAB5B
SMCHD1
TAGLN2
RAB1A
HNRNPH3
AHNAK
EIF3E
RALY
AURKAIP1
APMAP
MAGEC1
CPNE9
HID1
SEPTIN7
ADAR
USF1
ERN1
CDKN2A
UBR5
ZBTB17
ATG7
TRAF2
ORMDL3
CES1
BGLAP
HES1
NPY2R
HRAS
AGRP
SHBG
CDKN1A
RPS2
ARNT2
ADCY1
NAGLU
NOS1
MAP2K7
PRKAA2
SLC2A1
SLC16A1
TMPO
HTT
HNRNPK
PRDX2
PSMC2
ATF1
VRK3
HBA2
SRC
PRDX1
RANBP2
RPL10
RUVBL1
RUVBL2
RPS14
RPS17
PSMC1
WDR77
RAN
NOS2
CRHR1
CCNA2
TFEB
KRAS
FBXO5
CYP21A2
CAD
COPS8
DYNC1H1
TRPV1
HDAC2
SLC25A10
TOP2A
FBXO9
FBXO22
ELANE
FGF8
PHGDH
ABCC2
SDHA
ACLY
MTHFD1
NDUFS3
GMPS
EEF1A1
ALDH9A1
KHSRP
SMC4
ANAPC7
HSPA1B
BAG2
SMC2
SRM
DNAJC7
ATP5F1A
MARS1
DARS1
DCTPP1
EPRS1
IARS1
RARS1
GCN1
CYP7A1
ERC2
DEFB1
CEBPB
CYP2D6
CHKA
CCNE1
DICER1
PEMT
RGS20
PGR
XPA
SLC12A2
SLC5A1
NUP98
RAE1
NPSR1
HELLS
IMMT
SUV39H2
CHI3L1
MAFK
APC
TF
MMP3
COPA
SERPINF2
STAR
MITF
GSTP1
PIK3R2
PEBP1
ABCB1
GIP
EPO
IFNA1
SLC9A3
PPP2CA
ATR
MT1F
FOXP3
TLR4
SLC6A3
HBA1
CELF2
CNP
TUBB
YWHAB
YWHAQ
SNRNP200
HNRNPH1
NASP
ETV6
STAT3
HTR2C
CGA
GAST
UCP3
ATP1A1
NPM1
ATP1A3
CRKL
MCM4
TUFM
YWHAH
EEF1A2
EIF4A1
MCM5
C1QBP
EIF4A2
MCM7
XRCC6
KRT10
NXN
PPP2R2A
RPN1
SLC25A5
TCP1
XRCC5
XRN2
DDX20
EFTUD2
KHDRBS1
KRT2
PABPC1
PCBP1
PRDX4
PTBP1
USP11
AKAP8
CCT4
HNRNPDL
KPNA1
MAP4
PABPC4
CCT6A
DDX17
HNRNPF
HNRNPM
ILF3
DDX3Y
DHX15
SCYL2
GARS1
GEMIN5
PABPC3
SEC16A
PPP2R2D
OBI1
CACNA1C
GC
PTGDS
SYVN1
RRH
SCN8A
LMAN1
CSMD1
ATM
CYP2E1
VRK2
PSMB1
PSMD12
RHOA
GSR
OLFML3
RB1
GCK
ABCB7
ANGPTL2
SNCA
JAK2
NR1H3
ESRRB
CAMK1
NCAM1
ATG14
H2BC15
AQP3
SPSB1
RPA2
MAOA
FHIT
CHRM3
NECTIN1
THPO
RYR2
AR
GGT1
NR1I2
NR6A1
MAGEC2
TAC1
GPT
SLC46A1
FGF21
RPS6KA1
DNAH8
CCL4
IGFBP7
ADIPOR1
ADIPOR2
JUND
PSME1
HLA-DQB1
CYP19A1
CAT
PDE4D
EYA1
OPCML
MYRIP
CUL3
SERPINA7
GNA11
FBXL17
SKP2
TGFB2
ANP32A
PROKR2
PSMA4
G0S2
NFKB1
SDC3
RPS6KB1
EIF4EBP1
SCT
PTEN
SMAD3
SNAI1
CD63
GPD1
TXNIP
KCNH4
BACH1
LY96
CLEC1B
HK2
TPT1
PLIN1
GRIN2C
ACHE
TSPO
PDPK1
PHB2
HFE
ETS1
RHO
CYP3A5
RBCK1
ADH4
SF3A3
LDHA
TUBB3
GSTM3
LDHB
IDI1
LDHC
UGP2
VAPA
AZIN1
HLA-DMA
HERPUD1
PPP1R3C
IFNG
DUSP1
OXTR
TRRAP
SLC2A2
RBP2
EPHB2
PTCH1
NEUROD1
TRIM35
NCOR2
SUGP1
THBS1
MIF
HTR1B
CALCA
MAPK3
TRIP12
TERT
TNPO1
PRKN
LEMD3
UCHL5
TBL3
UBE2O
COPS6
ZNF207
ZNF44
ZNF174
USP38
OGG1
KCNC2
AHRR
CDKN1B
PBRM1
CST3
HSF1
PRKG1
STX1A
TAB2
GFRA1
PURA
EIF4G2
MYF6
QKI
BTG1
CLDN5
TOB1
LDHD
NCKAP1
NCOA4
PIGF
RBPMS
ZFR
DAZAP2
STBD1
GTDC1
APOH
GRM1
MMADHC
SLC10A2
ST3GAL1
ING3
ITPK1
CYP2A6
HCRTR1
MTHFR
CREB3
P2RX7
PARP1
HSD11B2
STAG2
PEPC
INSL6
SOX14
FBXL12
FBXL6
FBXL8
FBXL22
ENSG00000265690
HSD11B1
ELF5
IL1RN
ADRA2A
ALPP
TGFB1
TAT
AVPR1B
CP
GPRASP1
ROCK1
TWIST1
ARHGDIA
NR1H4
TLK2
KISS1
BVES
CA6
ENHO
ACTL6A
CTCF
ZNF704
IL2RA
TNRC6B
GCH1
TYMS
TPH2
OXT
ATF6
DIO2
PDC
VWF
MEN1
PFAS
DDIT3
ATF3
CEBPG
NPAS3
IL4
PNPLA3
USP30
DDC
MEF2A
GUSB
KDM1A
SRD5A1
DRD3
PTGDR
ARRB1
CYP11B2
MRE11
GLUL
PIK3C2A
PPOX
PCNA
BAX
ADRB2
XDH
RPL3
PSME4
HUS1
PRDX6
SYP
IGF1R
RRAS2
EPB41
GRM7
HABP2
PRKCB
TRPA1
CBLB
FANCL
GRIK1
PTPRT
AFF2
ATRIP
COL9A1
DLGAP1
DSCAM
NTM
OPHN1
RGS6
RND3
DOCK4
SEC23IP
ANKS1B
IRX1
LRRC4C
RNF19A
SORCS1
ATP10B
CD180
FOXN3
NAALADL2
ARL4A
NCOA7
NXPH1
RASSF8
SPCS3
TANC2
LCORL
POF1B
TXNDC2
VTA1
BRMS1L
KCTD8
RHBDD1
PELI2
ZNF662
FERD3L
MAP9
OR10R2
HDX
CTXN3
CDC14C
ZBTB20
BRF1
SCP2
TSHB
TCN1
TCAP
BSX
JUN
GLUD1
TDO2
PSEN2
RBX1
GSK3A
OPRL1
PNOC
NR4A1
ID4
CYP2C19
YY1
KCNH7
FKBP5
GFAP
AHCY
HCN2
BLZF1
SLC24A3
PLAU
ADCYAP1R1
DROSHA
CBL
TSC2
SPRY2
GATD3
CYP3A4
MED9
SEM1
BRINP1
BLMH
GRM5
ARID1A
RABGEF1
RAP1GAP
KCNQ1
FOSB
GADD45A
TUBA1B
ABHD5
HS3ST2
XBP1
NFE2
HMGCR
ANKK1
HEBP1
CYP11B1
FABP7
DCP2
SIM1
MT2A
CHD4
CEBPE
MTAP
AFP
GAPVD1
RHOD
ITGB1
PRKCD
ADSL
ALDH6A1
ADCY8
CA14
CYP51A1
MANBA
CCS
AK5
SLC25A17
BRMS1
DNAJC2
PTGR2
ERI1
NUDT3
PPM1L
COQ10B
YIF1A
SPTSSB
HIKESHI
MMP9
NRARP
ZNF423
MEIS1
SCYL1
TAC3
SELE
PLK4
RRBP1
RND1
NOTCH1
DHFR
HIF1AN
MT3
USP46
HCFC1
RING1
SEC13
DMAP1
PSMD13
COX7B
NUP88
RPS4X
MED30
MED10
CCND1
PRKACB
PRKACG
PRKAR1B
PRODH
PRKAR2B
ADRB3
DHCR7
SMC1A
TAF1
GNS
NFKBIA
CAMK2D
KMT2C
SMARCD1
ACBD3
RFX4
PPP4C
SETD2
HNMT
MFSD2A
IDH1
ATF5
IL2
APOA4
RARG
THRA
MYOD1
G6PC1
CREB3L3
TRH
DGKQ
MPO
SULT2A1
TELO2
EHMT2
CDK6
IKBKB
TPO
NMNAT1
ABCC3
PKLR
INPP5D
PFKP
PIK3R5
ACSF3
IRF4
MECR
PANK2
HAS3
B4GALT2
CIDEC
FFAR1
BRWD1
SERINC1
DHX29
SLC25A27
SRPRB
FUT5
KCNG2
YTHDC1
EXOSC4
ENY2
H1-5
KMT5B
MTARC2
DUSP6
CXCL8
HSPA4
HTR3A
H3-3B
LPL
ODC1
PIK3CG
SSBP1
INTS2
GBA
OPRM1
MC4R
HPGDS
BAD
SCN1A
NR5A2
KIF11
PDE4A
TRPV6
TRPV5
GRIK2
MMP2
AKT1
TET2
UCP1
CREB3L1
CYP8B1
RPS6KA5
GCKR
CYP1A2
SULT1A3
RBL1
TIMP1
PTGS2
PVALB
CDH1
CCKBR
CYP11A1
HSPG2
ME1
RPL38
PTS
IL1A
EIF4G1
EIF3B
TCF7L2
BMP4
BRCA2
ABCC4
ALDH2
LIPE
GHSR
DRD1
GNRHR
MRGPRX1
SCN5A
SLC6A2
DDB2
CSNK1G3
POU1F1
TRIM24
FOSL2
RBM3
USP21
NQO2
PAH
MAT1A
MAT2A
QDPR
MECP2
ST3GAL3
RAPGEF3
KMT2D
NAT2
DIO3
ICAM1
CAVIN2
SULT1A1
FABP4
IL6R
ADRA2C
UCP2
WEE1
EGFR
CYP1A1
CALB2
HDC
CDK2
ARF1
GUCA2B
DUSP4
CYP1B1
FADS1
CDC25A
JUNB
FBXO31
CLSPN
EGF
FBXL14
ADK
CYP17A1
FBP1
IDS
CACNA1A
GLDC
ACACB
AK1
AKR1B1
HADHB
LBR
ADD1
RBP4
SULT2B1
PDK4
AADAC
ADH7
DDAH1
MAOB
DIO1
EXOSC2
EXOSC3
FBP2
IFNB1
VAMP2
OSBP
AOC1
EXOSC5
TNRC6A
GJA1
MCL1
BRD4
FXN
RPA1
FDX1
RBP1
TBXT
ABCC1
HMOX2
RNF2
SETD7
SREBF2
RPL4
SLC27A1
CXXC1
PSMD8
COX11
H2AC6
CASP8
EEA1
NFE2L1
SLC22A1
GDF15
ATF7
BATF3
COP1
ANGPTL8
DLK1
CALR
CSN2
CDH13
ADCY5
GLP1R
UBE2I
KMO
PNMT
BAG1
G6PC2
ACER2
HEBP2
SLC48A1
RHNO1
BOK
RAB27A
PAX6
MGMT
ACTB
ECE1
STXBP1
CPS1
CYP2C8
GALNS
MAP2K3
PI4KA
SLC2A3
ADCY3
APRT
BCKDK
CYP7B1
ENO2
HPRT1
PDK1
SUCLA2
ATIC
CTPS1
FDXR
GNAI1
GNAI2
GPT2
HSD17B4
ITPR3
RAD21
SMC3
CHD2
ENPP2
PCBD1
PFKFB3
VAPB
CTBP2
EBP
EMD
GATAD2B
HDAC10
PI4KB
PTPN13
SDC4
SDHD
GNB2
GNB4
SULT1A2
TINF2
BAZ1B
CUL7
EBF1
GBA2
GGT7
SLC3A2
ST3GAL4
BAZ1A
CDC16
DDHD2
HMGN2
CTPS2
MTMR6
RNF40
HNRNPA0
MMS19
MT1A
ABHD14B
ATP6V0B
GLYATL1
AGMO
ATP5F1D
WAPL
ATP5MC3
CIAO2B
S100G
MSH6
BACE1
SMN2
S100A1
PTMA
SPARC
UBE2N
ASCL1
RAD18
TOPBP1
RAD9A
INTS7
RAD1
NABP2
ACKR1
PTPRD
CDC34
CLDN1
CSF1
NEUROG1
HDAC9
PLP1
PDE12
GRIN2A
FN1
GRIN1
IRS1
ADARB1
MAP2K5
NEFH
AKAP13
RAD17
SIRPA
CD47
CUL4B
GNAZ
VAMP7
NES
UBE2K
AMBRA1
DCAF8
WDR61
CEBPZ
DCAF7
INTS3
NOL7
DDA1
DCAF11
DET1
PTPDC1
H2BC12L
MIR6883
BTBD9
CARTPT
CDK4
CHRM1
CHRNB2
CLDN4
CRX
DDX5
DHX9
DYRK1A
FAS
GHRH
HNF1B
HOMER1
KCND2
KCNMA1
LGR4
MIR1281
MIR3064
MIR4751
MIR5047
MIR5572
MTTP
NLGN1
NPS
NTRK1
NTRK3
OPN3
PAX4
PRF1
PRKAA1
PRKG2
PROK1
ROCK2
SETX
SFTPC
SIX3
TNFRSF11A
UTS2
UTS2R
ZFHX3
ELOVL3
DELEC1
CSF2
GHRHR
FBXL21P
