# Supplementary material for: Identifying novel circadian rhythm biomarkers for diagnosis and prognosis of melanoma by an integrated bioinformatics and machine learning approach
Source: Aging (Albany NY). 2024 Jun 20;16(16):11824–42. doi: 10.18632/aging.205961 (PMC11386929; doi:10.18632/aging.205961)
Supplement: Supplementary Table 2 [file aging-16-205961-s002.xlsx]

## Sheet: Sheet1
Supplemental Table 2. Hub genes-WGCNA.
Gene	Module	MM_R	MM_pvalue	GS_R	GS_pvalue
C4orf48	blue	0.862495	5.63874e-26	0.792254	2.81865e-19
EDNRB	blue	0.903242	7.23118e-32	0.780536	2.07283e-18
CYP4F12	cyan	0.863074	4.80048e-26	-0.776859	3.78086e-18
TSPAN8	cyan	0.760831	4.57141e-17	-0.774138	5.85559e-18
SLC45A2	blue	0.833342	8.10018e-23	0.766494	1.9386e-17
MYO5A	blue	0.844891	5.44272e-24	0.764067	2.80817e-17
PIK3CD	blue	0.781073	1.89673e-18	0.7659	2.12349e-17
PDZD2	blue	-0.872919	2.76552e-27	-0.754586	1.14612e-16
LOC285628 /// MIR146A	blue	0.900996	1.76926e-31	0.751617	1.75721e-16
BCL2A1	blue	0.787776	6.1317e-19	0.747583	3.11087e-16
TRIB2	blue	0.865679	2.30565e-26	0.747921	2.96681e-16
STARD3NL	blue	0.864978	2.81333e-26	0.74968	2.31487e-16
GPR19	blue	0.853212	6.75978e-25	0.741999	6.73935e-16
WIF1	blue	-0.833691	7.48751e-23	-0.740022	8.81939e-16
TTYH2	blue	0.863118	4.74169e-26	0.743037	5.84572e-16
MIR21 /// VMP1	cyan	-0.733084	2.22407e-15	0.745037	4.43669e-16
SCGB2A2	cyan	0.699119	1.40363e-13	-0.738391	1.09909e-15
ATP13A5	cyan	0.769296	1.25661e-17	-0.742773	6.06171e-16
SNX10	cyan	-0.772282	7.86384e-18	0.738527	1.07907e-15
UPP1	lightyellow	0.809697	1.12665e-20	0.73864	1.06287e-15
LOC100996643 /// LOC101928195 /// MTHFD1L	blue	0.852467	8.19058e-25	0.739186	9.87472e-16
HMGCS2	cyan	0.802417	4.49069e-20	-0.73653	1.40998e-15
DCD	cyan	0.704889	7.23463e-14	-0.735101	1.70481e-15
RASSF6	cyan	0.750092	2.1835e-16	-0.735273	1.66637e-15
SCGB2A1	cyan	0.658508	9.90074e-12	-0.7334	2.13365e-15
BACE2	blue	0.852034	9.15304e-25	0.734757	1.78424e-15
PRAME	blue	0.812934	5.97723e-21	0.732232	2.48679e-15
SCGB1D2	cyan	0.676124	1.69759e-12	-0.731742	2.65116e-15
PAIP2B	blue	-0.81718	2.55346e-21	-0.732758	2.3214e-15
PTPRM	blue	0.844417	6.10627e-24	0.73918	9.883e-16
PNKD	blue	0.81348	5.36418e-21	0.732014	2.55872e-15
DLG2	cyan	0.85992	1.14335e-25	-0.72904	3.76392e-15
LINC00518	blue	0.851346	1.0913e-24	0.727807	4.41023e-15
LINC00152 /// LOC101930489 /// MIR4435-1HG	saddlebrown	0.80607	2.26039e-20	0.730909	2.95504e-15
CLDN8	cyan	0.854722	4.5666e-25	-0.726184	5.42673e-15
LOC284578	cyan	0.660716	7.98877e-12	-0.727312	4.69907e-15
ALX1	blue	0.876411	9.48586e-28	0.726462	5.23748e-15
KIF3C	blue	0.789967	4.20207e-19	0.728303	4.13815e-15
SDCBP	blue	0.869331	8.03745e-27	0.734472	1.85271e-15
TMEM140	blue	0.750472	2.06883e-16	0.727314	4.69801e-15
PLEKHO2	lightyellow	0.798128	9.87458e-20	0.727046	4.86188e-15
STXBP1	blue	0.836781	3.70527e-23	0.726905	4.95016e-15
GIPC2	cyan	0.842718	9.19575e-24	-0.725428	5.97396e-15
RP11-757F18.5	cyan	0.735887	1.53595e-15	-0.722989	8.12745e-15
HSD17B11	cyan	-0.733663	2.06129e-15	0.726056	5.51576e-15
BTBD16	cyan	0.764793	2.51457e-17	-0.723194	7.92023e-15
PLOD3	blue	0.8476	2.79788e-24	0.720783	1.07062e-14
PIK3C2G	cyan	0.90073	1.9639e-31	-0.718983	1.33795e-14
LDHB	cyan	-0.885484	5.02341e-29	0.723769	7.36802e-15
NIPA2	blue	0.850372	1.39717e-24	0.730137	3.26625e-15
GDPD2	cyan	0.832066	1.07779e-22	-0.716724	1.76558e-14
SYT8	blue	-0.673997	2.11374e-12	-0.721585	9.68806e-15
RAB32	lightyellow	0.791431	3.25608e-19	0.715846	1.96527e-14
SOX10	blue	0.907901	1.05146e-32	0.713652	2.56375e-14
MACC1	cyan	0.826169	3.91465e-22	-0.71591	1.95002e-14
CGB7 /// NTF4	cyan	0.850088	1.50114e-24	-0.714141	2.4167e-14
KIAA1549L	blue	0.791343	3.30681e-19	0.713212	2.70337e-14
CHST11	blue	0.814575	4.314e-21	0.711081	3.48955e-14
BBS12	cyan	-0.790187	4.0448e-19	0.711325	3.38969e-14
S100B	blue	0.872266	3.3656e-27	0.710277	3.84053e-14
KIAA2022	cyan	0.765048	2.4188e-17	-0.713459	2.6241e-14
SLC6A15	blue	0.860669	9.32043e-26	0.709152	4.38872e-14
AGFG2	cyan	0.818585	1.91795e-21	-0.719201	1.30243e-14
LGALS3BP	lightyellow	0.844582	5.86675e-24	0.708755	4.59915e-14
EIF4EBP1	lightyellow	0.860196	1.06058e-25	0.708907	4.51771e-14
OVOL2	cyan	0.876559	9.05828e-28	-0.704979	7.15963e-14
EMP3	lightyellow	0.746574	3.58272e-16	0.704326	7.72335e-14
GMPR	blue	0.776994	3.69875e-18	0.701471	1.07337e-13
MLPH	blue	0.901481	1.46126e-31	0.702795	9.21927e-14
MYEF2	blue	0.802796	4.18439e-20	0.702321	9.73626e-14
C12orf5	blue	0.873021	2.6811e-27	0.701878	1.02443e-13
KIAA1211	blue	0.839637	1.90895e-23	0.699786	1.30125e-13
FOXD3-AS1	blue	0.814615	4.27926e-21	0.700962	1.13781e-13
PIP	cyan	0.67784	1.42032e-12	-0.698375	1.52719e-13
PRR15L	cyan	0.736756	1.36809e-15	-0.698719	1.46873e-13
NPY1R	cyan	0.769611	1.1964e-17	-0.697468	1.69193e-13
PPM1D	cyan	-0.778156	3.06244e-18	0.705862	6.45991e-14
BEST1	blue	0.759362	5.68921e-17	0.697916	1.60853e-13
RNF157	blue	0.83741	3.20528e-23	0.696841	1.81568e-13
FMN1	blue	0.87275	2.90978e-27	0.695988	1.99812e-13
CLDN10	cyan	0.658744	9.67675e-12	-0.694847	2.26995e-13
C7orf49	blue	0.773681	6.29818e-18	0.704253	7.78951e-14
ELL3	cyan	0.657012	1.14386e-11	-0.700757	1.16481e-13
ANXA5	blue	0.867299	1.45019e-26	0.700508	1.19841e-13
LOC100505592	blue	0.877026	7.82933e-28	0.693578	2.61417e-13
GPRIN2	cyan	0.898464	4.73055e-31	-0.695049	2.21947e-13
EN2	blue	0.816923	2.69038e-21	0.692886	2.82259e-13
SCN7A	cyan	0.785698	8.73981e-19	-0.692414	2.97353e-13
SGCD	blue	0.850118	1.48983e-24	0.691433	3.31325e-13
EVPLL	cyan	0.786446	7.69652e-19	-0.694358	2.3972e-13
TRIM63	blue	0.839132	2.14821e-23	0.688044	4.79831e-13
AEN	blue	0.806885	1.93551e-20	0.691484	3.29482e-13
BNIPL	cyan	0.775071	5.04278e-18	-0.689346	4.16455e-13
PAG1	blue	0.808126	1.52595e-20	0.686784	5.49927e-13
AQP5	cyan	0.708811	4.5691e-14	-0.684852	6.76965e-13
LHFPL2	cyan	-0.834832	5.7853e-23	0.688831	4.4048e-13
CERS1 /// GDF1	blue	0.836501	3.95163e-23	0.68731	5.19561e-13
C1QTNF7	cyan	0.714096	2.42991e-14	-0.685703	6.17871e-13
TNNI2	blue	-0.64966	2.29848e-11	-0.686579	5.62256e-13
MIA	blue	0.848687	2.13474e-24	0.684302	7.18025e-13
HES6	blue	0.821519	1.04634e-21	0.684804	6.80438e-13
FTH1	saddlebrown	0.819032	1.74989e-21	0.698653	1.47987e-13
TMEM213	cyan	0.605084	1.08508e-09	-0.684485	7.04108e-13
PPP1R14D	cyan	0.702616	9.4113e-14	-0.688205	4.71507e-13
CAMSAP3	cyan	0.87935	3.75867e-28	-0.684542	6.99819e-13
SCARA5	cyan	0.783502	1.26566e-18	-0.68266	8.55295e-13
LAMB4	cyan	0.767558	1.64549e-17	-0.683074	8.18494e-13
PPP1R1B	cyan	0.748422	2.7649e-16	-0.68162	9.55061e-13
PHACTR1	blue	0.839584	1.93266e-23	0.681466	9.70668e-13
ARNT2	blue	0.814445	4.42689e-21	0.681548	9.62329e-13
AP1S2	blue	0.906655	1.77858e-32	0.683202	8.07464e-13
MARCKSL1	blue	0.777316	3.51059e-18	0.684057	7.37089e-13
LINC00473	blue	0.835433	5.04549e-23	0.679507	1.1931e-12
NEK6	cyan	-0.82133	1.08849e-21	0.683081	8.17855e-13
FAIM3	blue	0.664762	5.36635e-12	0.680098	1.12129e-12
RTP4	saddlebrown	0.776833	3.7966e-18	0.679575	1.18462e-12
RGS20	blue	0.912772	1.25116e-33	0.678895	1.27223e-12
A1BG	lightyellow	0.846413	3.75089e-24	0.681997	9.17619e-13
PTPRF	cyan	0.868539	1.01272e-26	-0.679508	1.19297e-12
ZNF697	blue	0.875909	1.10836e-27	0.681244	9.93776e-13
ZBTB16	green	0.770578	1.02847e-17	-0.677973	1.40081e-12
DISC1 /// TSNAX-DISC1	blue	0.792426	2.73455e-19	0.681167	1.00189e-12
WIPF1	saddlebrown	0.839013	2.20873e-23	0.678801	1.28475e-12
IGSF1	cyan	0.74161	7.10701e-16	-0.682834	8.39695e-13
PKN1	lightyellow	0.816187	3.12188e-21	0.678754	1.29109e-12
CYP2U1	blue	0.798728	8.85446e-20	0.683522	7.80346e-13
PLA2R1	cyan	0.715701	2.00023e-14	-0.678764	1.28967e-12
ADAM33	cyan	0.798198	9.74926e-20	-0.677162	1.52418e-12
ANKRD18A	darkorange	-0.724265	6.9208e-15	-0.678481	1.3285e-12
SLC6A2	cyan	0.76299	3.30553e-17	-0.678102	1.38209e-12
KLRG2	cyan	0.850782	1.25938e-24	-0.674419	2.02402e-12
GNPDA1	blue	0.817463	2.41088e-21	0.680653	1.05768e-12
TUBB4A	blue	0.70332	8.67708e-14	0.672033	2.58414e-12
ARMC9	lightyellow	0.729994	3.32751e-15	0.672368	2.49735e-12
PLLP	cyan	0.783261	1.31776e-18	-0.67221	2.53796e-12
PSEN2	lightyellow	0.791662	3.12726e-19	0.673427	2.24107e-12
GPM6B	blue	0.816789	2.76385e-21	0.67263	2.43151e-12
C1orf216	lightyellow	0.818865	1.81081e-21	0.674821	1.94203e-12
WIPI1	lightyellow	0.713588	2.58348e-14	0.67283	2.38239e-12
TBC1D16	lightyellow	0.741194	7.52214e-16	0.672055	2.5785e-12
MAMLD1	blue	0.762389	3.6192e-17	0.674116	2.08816e-12
TNNT2	cyan	0.80361	3.59421e-20	-0.670765	2.93974e-12
NEBL	cyan	0.858549	1.65615e-25	-0.670468	3.02941e-12
SLITRK4	blue	-0.77643	4.05222e-18	-0.669368	3.38584e-12
ANO9	cyan	0.891844	5.50166e-30	-0.669145	3.46265e-12
HS3ST6	cyan	0.888148	2.02177e-29	-0.668327	3.75976e-12
NOS1	cyan	0.794409	1.92599e-19	-0.678105	1.38166e-12
RERGL	cyan	0.721225	1.01334e-14	-0.666334	4.58985e-12
RP11-96D1.11	cyan	0.920411	3.41121e-35	-0.666334	4.59004e-12
EFNA4	cyan	0.828135	2.56024e-22	-0.668885	3.55471e-12
CHSY3	blue	0.768529	1.41586e-17	0.666498	4.51555e-12
STX7	blue	0.836962	3.55481e-23	0.671726	2.66634e-12
EPCAM	cyan	0.796523	1.31952e-19	-0.665262	5.1066e-12
RSPH1	cyan	0.670668	2.96873e-12	-0.667508	4.08169e-12
KCND3	cyan	0.656114	1.24695e-11	-0.686327	5.7776e-13
CTSL	blue	0.743311	5.63e-16	0.667776	3.97352e-12
FAM213B	blue	0.791241	3.36639e-19	0.671572	2.70835e-12
BLM	cyan	-0.7622	3.7235e-17	0.666903	4.33656e-12
ISM1	cyan	0.882155	1.51818e-28	-0.666895	4.34004e-12
RORC	cyan	0.834297	6.5306e-23	-0.66723	4.19712e-12
STAM	blue	0.814413	4.45549e-21	0.668858	3.56424e-12
INHBB	cyan	0.760029	5.15236e-17	-0.666431	4.54544e-12
HSD11B2	cyan	0.897271	7.45284e-31	-0.663297	6.20232e-12
CD63	lightyellow	0.787012	6.98837e-19	0.66926	3.42284e-12
CAPZA3	cyan	0.691193	3.4019e-13	-0.663991	5.79127e-12
SGSM1	cyan	0.766008	2.08843e-17	-0.665827	4.82738e-12
BICD1	cyan	-0.843041	8.5097e-24	0.664941	5.27147e-12
CEP170 /// CEP170P1	cyan	-0.912751	1.26318e-33	0.663622	6.00667e-12
CDHR1	cyan	0.879318	3.79652e-28	-0.662127	6.95858e-12
TMEM61	cyan	0.804105	3.27588e-20	-0.66441	5.5566e-12
CYP3A5	cyan	0.82877	2.22992e-22	-0.662345	6.81105e-12
STK10	saddlebrown	0.831504	1.22136e-22	0.666744	4.4058e-12
LRRC8D	blue	0.759677	5.42946e-17	0.667216	4.20292e-12
TYR	blue	0.84216	1.05091e-23	0.660923	7.82875e-12
CCL3 /// CCL3L1 /// CCL3L3	saddlebrown	0.802311	4.57971e-20	0.661336	7.51885e-12
GPR115	cyan	0.904562	4.23026e-32	-0.661833	7.16209e-12
GNA12	lightyellow	0.682319	8.86835e-13	0.669768	3.25173e-12
LOC100509445 /// LOC728715 /// OVOS /// OVOS2	blue	0.782733	1.43939e-18	0.661575	7.34543e-12
RAB27A	blue	0.774041	5.94648e-18	0.662673	6.59508e-12
ST3GAL5	blue	0.815212	3.79772e-21	0.663859	5.8678e-12
SLC16A4	blue	0.886668	3.36198e-29	0.660024	8.54617e-12
MFSD4	cyan	0.698413	1.52053e-13	-0.66274	6.55157e-12
SCARA3	blue	-0.732193	2.49958e-15	-0.661889	7.12236e-12
PRKAA2	cyan	0.579907	7.44285e-09	-0.660931	7.82286e-12
CDC42BPG	cyan	0.788726	5.20776e-19	-0.666845	4.36178e-12
DEGS1	cyan	0.778114	3.08347e-18	-0.670571	2.99811e-12
PLEKHG5	cyan	0.840732	1.47519e-23	-0.666101	4.69776e-12
CFTR	cyan	0.672974	2.34736e-12	-0.658895	9.53654e-12
FCRLB	blue	0.85221	8.7505e-25	0.658465	9.94182e-12
DTL	midnightblue	0.909201	6.02855e-33	0.659743	8.78287e-12
TMEM254-AS1	cyan	0.685073	6.61115e-13	-0.663094	6.32737e-12
ST3GAL4	blue	0.857511	2.18724e-25	0.659779	8.75176e-12
TNXA /// TNXB	cyan	0.841182	1.3259e-23	-0.656707	1.17784e-11
DLG5	cyan	0.790149	4.0717e-19	-0.663851	5.8723e-12
KRT7	green	0.777609	3.34728e-18	-0.657247	1.11826e-11
H2AFZ	blue	0.851723	9.91034e-25	0.669259	3.42313e-12
GYG2	blue	0.773467	6.51669e-18	0.656117	1.24649e-11
LBX2-AS1	blue	0.773855	6.126e-18	0.656532	1.19785e-11
KRT72	darkgreen	0.731654	2.68173e-15	-0.660296	8.32248e-12
GPSM3	saddlebrown	0.794171	2.00923e-19	0.658434	9.97133e-12
WNT2B	cyan	0.69245	2.9619e-13	-0.656727	1.17565e-11
CDK5R1	blue	0.835811	4.62835e-23	0.658415	9.99009e-12
NAT8L	blue	0.780282	2.16121e-18	0.656928	1.15307e-11
ZNF280B	blue	0.847249	3.05214e-24	0.653184	1.6489e-11
MST1R	cyan	0.822779	8.03947e-22	-0.654057	1.51768e-11
ADAM10	cyan	-0.82988	1.7484e-22	0.653815	1.55299e-11
CDC42EP3	blue	0.612358	6.0263e-10	0.65647	1.20501e-11
ANKRD28	blue	0.800704	6.16572e-20	0.655028	1.38346e-11
MESDC1	lightyellow	0.732462	2.41308e-15	0.653108	1.66095e-11
EXPH5	cyan	0.920192	3.80061e-35	-0.649805	2.26749e-11
NAT14	lightyellow	0.860675	9.30702e-26	0.651325	1.96576e-11
RNF144A	blue	0.705327	6.87555e-14	0.652381	1.7792e-11
ZNF204P	lightyellow	-0.774	5.98584e-18	-0.649055	2.43233e-11
C11orf52 /// HSPB2 /// HSPB2-C11orf52	green	0.79006	4.13482e-19	-0.649224	2.39416e-11
CYP4B1	green	0.784407	1.08714e-18	-0.648126	2.65248e-11
GSTO2	cyan	0.930195	1.92021e-37	-0.647627	2.77859e-11
SRPX	cyan	-0.731573	2.71038e-15	0.649705	2.28894e-11
GRIN2A	cyan	0.719198	1.30292e-14	-0.652325	1.78868e-11
RFX5	blue	0.795546	1.57241e-19	0.655172	1.3646e-11
ZG16B	cyan	0.810624	9.40818e-21	-0.647186	2.8948e-11
IDI2-AS1	blue	0.817842	2.23216e-21	0.648013	2.68054e-11
POU2F3	cyan	0.884515	6.95544e-29	-0.647212	2.88759e-11
TTC7B	blue	0.792676	2.61722e-19	0.652617	1.73991e-11
LINC00920	blue	0.831896	1.11938e-22	0.647201	2.89079e-11
CHP2	cyan	0.913779	7.93638e-34	-0.646269	3.15137e-11
LOC101929880 /// QPRT	blue	0.842568	9.53258e-24	0.647263	2.87399e-11
PARP1	blue	0.810305	1.00119e-20	0.651522	1.92967e-11
TJP3	cyan	0.831571	1.20343e-22	-0.648122	2.65344e-11
SNCA	blue	0.788977	4.9876e-19	0.646184	3.17611e-11
PRRG3	cyan	0.709768	4.07938e-14	-0.649352	2.36573e-11
TTYH3	lightyellow	0.790398	3.89886e-19	0.647072	2.92552e-11
ILDR1	green	0.816708	2.80968e-21	-0.648213	2.63109e-11
CABLES1	blue	0.813651	5.18572e-21	0.646462	3.09562e-11
CMC2	blue	0.831951	1.10583e-22	0.656894	1.15685e-11
IGSF9	cyan	0.883286	1.04656e-28	-0.645501	3.38294e-11
OBP2B	cyan	0.593174	2.7543e-09	-0.646468	3.09371e-11
TFPT	lightyellow	0.858987	1.47174e-25	0.647912	2.70587e-11
CES4A	cyan	0.917292	1.54845e-34	-0.644502	3.70873e-11
ARPC1B	lightyellow	0.821176	1.1238e-21	0.6465	3.08468e-11
PTTG1IP	blue	0.784266	1.11313e-18	0.655509	1.32129e-11
ICAM1	cyan	-0.735752	1.56379e-15	0.643593	4.03113e-11
C19orf12	blue	0.689788	3.96804e-13	0.650787	2.06793e-11
TRAK2	darkorange	0.640594	5.29713e-11	0.646635	3.04641e-11
GSTM5	cyan	0.806653	2.02292e-20	-0.642978	4.26422e-11
GAS2L3	blue	0.802299	4.59045e-20	0.64417	3.82345e-11
ADAMTS9-AS2	blue	-0.738952	1.01912e-15	-0.646424	3.10645e-11
BTC	blue	-0.65376	1.56115e-11	-0.642415	4.48904e-11
WARS	saddlebrown	0.8295	1.90047e-22	0.643311	4.13633e-11
IL12RB2	blue	0.770441	1.05084e-17	0.641753	4.76801e-11
HLF	cyan	0.842346	1.0053e-23	-0.641849	4.72648e-11
CCDC71L	lightyellow	0.705133	7.03262e-14	0.649395	2.35628e-11
KRT31	darkgreen	0.852339	8.4653e-25	-0.64058	5.30361e-11
LOC101928988	lightyellow	-0.674387	2.03076e-12	-0.641917	4.69749e-11
PAMR1	cyan	0.872288	3.34352e-27	-0.640472	5.35593e-11
NRXN1	blue	-0.648402	2.5852e-11	-0.648385	2.5892e-11
RSPO1	cyan	0.779823	2.33102e-18	-0.641979	4.67097e-11
PIP4K2A	cyan	-0.806873	1.93971e-20	0.641725	4.78009e-11
ASB9	blue	0.884205	7.71494e-29	0.640793	5.20212e-11
DUSP4	cyan	-0.730254	3.21713e-15	0.641575	4.84598e-11
LINC01133	cyan	0.885082	5.75127e-29	-0.640881	5.16091e-11
CPEB3	cyan	0.566992	1.87884e-08	-0.645271	3.45544e-11
ACOT9	cyan	-0.737316	1.26941e-15	0.64645	3.09901e-11
HILS1	blue	0.795332	1.63369e-19	0.639575	5.80805e-11
CCL27	cyan	0.823707	6.61222e-22	-0.63836	6.47959e-11
TENM1	darkorange	-0.80859	1.39565e-20	-0.641716	4.78407e-11
TRPV6	cyan	0.90303	7.87459e-32	-0.640225	5.47675e-11
AGTR1	cyan	0.666068	4.71303e-12	-0.638661	6.30662e-11
STRADB	cyan	-0.720708	1.08068e-14	0.64298	4.26346e-11
IGSF11	blue	0.844646	5.77627e-24	0.637148	7.22316e-11
YBX2	cyan	0.593524	2.68139e-09	-0.638526	6.38351e-11
FAM101B	lightyellow	0.686082	5.93189e-13	0.6397	5.74294e-11
CTNNBIP1	cyan	0.83198	1.09875e-22	-0.639712	5.7368e-11
QPCT	blue	0.738773	1.04402e-15	0.637946	6.72446e-11
QPRT	blue	0.854385	4.98605e-25	0.63697	7.33905e-11
MYBPC1	cyan	0.519339	4.15401e-07	-0.636838	7.42614e-11
MAPRE1	darkorange	0.771787	8.50403e-18	0.650021	2.22208e-11
RP11-465B22.8	cyan	0.757272	7.74497e-17	-0.640726	5.23396e-11
ANKRD44	blue	0.7262	5.41538e-15	0.637682	6.88593e-11
MFSD2A	cyan	0.783902	1.18338e-18	-0.638323	6.50125e-11
C14orf64	cyan	0.718157	1.48125e-14	-0.638342	6.4902e-11
INPP4B	blue	0.766485	1.94109e-17	0.636438	7.69611e-11
PGM5-AS1	blue	-0.793447	2.28423e-19	-0.636155	7.89226e-11
C1orf68	cyan	0.821551	1.03948e-21	-0.635169	8.61628e-11
KIAA1324	cyan	0.67549	1.8125e-12	-0.63488	8.83993e-11
HOOK2	cyan	0.831361	1.26079e-22	-0.637281	7.13744e-11
ZNF273	darkred	0.814383	4.4821e-21	-0.634452	9.18149e-11
ASXL1	lightyellow	0.633022	1.04178e-10	0.644618	3.66951e-11
GSTO1	lightyellow	0.773889	6.09219e-18	0.638286	6.52245e-11
RORA	cyan	0.829987	1.70792e-22	-0.634145	9.435e-11
SGCG	cyan	0.778108	3.08621e-18	-0.634149	9.43101e-11
MYO3A	blue	-0.517889	4.53118e-07	-0.644013	3.87897e-11
SCNM1 /// TNFAIP8L2-SCNM1	lightyellow	0.784992	9.84886e-19	0.648596	2.5389e-11
RABIF	blue	0.818925	1.78872e-21	0.640962	5.12338e-11
HUS1	blue	0.824704	5.35225e-22	0.640483	5.35053e-11
LOC101927886	blue	0.779776	2.34907e-18	0.633899	9.6421e-11
PLCH2	cyan	0.801327	5.49598e-20	-0.637344	7.09727e-11
C3orf52	cyan	0.77543	4.76071e-18	-0.632981	1.0456e-10
ETS1	cyan	-0.739976	8.87501e-16	0.632813	1.06119e-10
NME4	lightyellow	0.802254	4.6283e-20	0.636791	7.45695e-11
FOLR1	cyan	0.563341	2.42362e-08	-0.631604	1.18007e-10
VMP1	cyan	-0.673492	2.2262e-12	0.632964	1.04713e-10
HSD17B14	blue	0.72972	3.4477e-15	0.633656	9.85105e-11
BTN2A2	blue	0.795142	1.69013e-19	0.631367	1.20479e-10
PSRC1	blue	0.749407	2.40609e-16	0.632534	1.08757e-10
RPRM	cyan	0.681764	9.40628e-13	-0.634183	9.40252e-11
BAMBI	blue	0.780078	2.23508e-18	0.630656	1.28218e-10
TG	cyan	0.697216	1.74072e-13	-0.631299	1.21205e-10
LOC100506374	cyan	0.890729	8.18597e-30	-0.630203	1.33387e-10
IFFO1	blue	0.739522	9.43659e-16	0.633594	9.90573e-11
SCEL	cyan	0.874719	1.59958e-27	-0.629741	1.38863e-10
STAC2	cyan	0.704229	7.81132e-14	-0.630326	1.31964e-10
SAT1	blue	0.669265	3.42117e-12	0.636279	7.80574e-11
C10orf11	blue	0.79068	3.71217e-19	0.631204	1.22214e-10
UBFD1	darkorange	0.783733	1.21744e-18	0.634642	9.02839e-11
DLX3	cyan	0.856969	2.52634e-25	-0.628621	1.53057e-10
SYN2	green	0.926054	1.87562e-36	-0.629392	1.43149e-10
SAMD4A	blue	0.797204	1.1672e-19	0.632548	1.0862e-10
VPS13D	cyan	0.785866	8.49409e-19	-0.634595	9.06634e-11
FGFR2	cyan	0.786156	8.08564e-19	-0.632567	1.08434e-10
SMIM22	cyan	0.658144	1.02551e-11	-0.63827	6.53183e-11
CA12	cyan	0.888867	1.57534e-29	-0.62815	1.59437e-10
PLEKHG6	cyan	0.863111	4.75103e-26	-0.628569	1.53746e-10
CNTN2	cyan	0.646187	3.17515e-11	-0.644761	3.6213e-11
ZEB2	cyan	-0.697747	1.63953e-13	0.629235	1.45119e-10
KRT19	cyan	0.701243	1.10187e-13	-0.626857	1.78274e-10
NRP2	cyan	-0.794948	1.74956e-19	0.627966	1.61994e-10
CBX3	darkorange	0.745366	4.23846e-16	0.631796	1.16033e-10
TRIM27	lightyellow	0.672449	2.47687e-12	0.633834	9.69739e-11
OR7E156P	blue	0.746091	3.83215e-16	0.630489	1.30102e-10
AURKA	midnightblue	0.903309	7.03706e-32	0.628003	1.61476e-10
KIAA1522	cyan	0.887747	2.32233e-29	-0.627475	1.69024e-10
LOC101927157 /// NIPAL1	cyan	0.688424	4.60412e-13	-0.627294	1.71682e-10
DMXL2	cyan	-0.690586	3.63635e-13	0.629387	1.43206e-10
MITF	darkorange	0.882694	1.27202e-28	0.625442	2.01342e-10
AK055981	cyan	0.765281	2.33432e-17	-0.626617	1.81999e-10
NRIP3	blue	0.749471	2.38429e-16	0.625217	2.05263e-10
RHOQ	greenyellow	0.687822	4.91536e-13	0.628389	1.56164e-10
SHROOM3	cyan	0.520993	3.75999e-07	-0.62642	1.85117e-10
HSPA13	cyan	-0.805766	2.39431e-20	0.627178	1.73407e-10
KDF1	cyan	0.930102	2.02419e-37	-0.624737	2.13875e-10
PLP1	blue	0.800631	6.24862e-20	0.623898	2.29758e-10
SERPINE2	cyan	-0.861662	7.09791e-26	0.624013	2.27514e-10
FOXA1	cyan	0.615018	4.84191e-10	-0.626424	1.85051e-10
INPP5F	blue	0.755642	9.83025e-17	0.625121	2.06953e-10
LOC102725451 /// TPTEP1	darkorange	-0.753413	1.35776e-16	-0.626058	1.90963e-10
MMP1	cyan	-0.68414	7.3057e-13	0.622891	2.50317e-10
RIC8B	cyan	-0.833468	7.87423e-23	0.630076	1.34866e-10
GLA	blue	0.765119	2.39253e-17	0.631518	1.18898e-10
LINC00964	cyan	0.761844	3.9279e-17	-0.622771	2.52891e-10
GPNMB	blue	0.843894	6.92933e-24	0.629078	1.47102e-10
MS4A7	yellow	0.73032	3.18989e-15	0.621744	2.759e-10
PMEL	blue	0.707436	5.37274e-14	0.621045	2.92677e-10
DQ592230 /// RP4-555D20.2	cyan	-0.674327	2.04338e-12	0.621069	2.9208e-10
EPHB3	cyan	0.76071	4.65495e-17	-0.626286	1.87258e-10
KCNAB2	blue	0.657291	1.11351e-11	0.627296	1.71649e-10
SPRED1	cyan	-0.718787	1.37081e-14	0.623659	2.34485e-10
RP11-164P12.4	cyan	0.873216	2.52759e-27	-0.619765	3.26004e-10
TYMSOS	lightyellow	0.756545	8.61584e-17	0.624153	2.24819e-10
PLEKHN1	cyan	0.755909	9.45524e-17	-0.633367	1.01059e-10
PHLDA1	blue	0.843885	6.94537e-24	0.619182	3.42341e-10
LIMD2	saddlebrown	0.769664	1.18645e-17	0.621422	2.83499e-10
PLAT	blue	0.77903	2.65499e-18	0.619048	3.46218e-10
CA3	darkorange	-0.729427	3.58032e-15	-0.618999	3.47654e-10
KMO	yellow	0.726697	5.08337e-15	0.618566	3.60466e-10
CDK2	lightyellow	0.736579	1.4008e-15	0.619196	3.41948e-10
LYPD6B	cyan	0.918999	6.81865e-35	-0.617755	3.85754e-10
FAM166B	green	0.810534	9.57479e-21	-0.622184	2.65804e-10
COL21A1	cyan	0.805357	2.58724e-20	-0.618321	3.67929e-10
ZC3HC1	lightyellow	0.784717	1.03173e-18	0.623715	2.33359e-10
CLDN4	cyan	0.844898	5.43234e-24	-0.619835	3.24095e-10
LOC338667	cyan	0.769176	1.28028e-17	-0.617115	4.06905e-10
TFAP2A-AS1	blue	0.791425	3.25971e-19	0.618056	3.76187e-10
GNG7	blue	0.779743	2.36171e-18	0.619208	3.41616e-10
GREB1	blue	0.67225	2.52774e-12	0.622005	2.69862e-10
ATP6V1B2	blue	0.741733	6.98893e-16	0.621136	2.90442e-10
RAPGEFL1	cyan	0.945209	1.26517e-41	-0.615984	4.46995e-10
FTH1P5	blue	0.675591	1.79376e-12	0.645126	3.50194e-11
KRT73	darkgreen	0.841304	1.28811e-23	-0.616382	4.32454e-10
LL22NC03-N14H11.1	cyan	-0.822612	8.32592e-22	0.615732	4.56437e-10
OSTM1	blue	0.811207	8.39601e-21	0.616695	4.21375e-10
FAAH	cyan	0.761153	4.3566e-17	-0.619161	3.42947e-10
WNK2	green	0.762338	3.64687e-17	-0.622154	2.66481e-10
PNMA6A	blue	0.690019	3.86918e-13	0.615449	4.67254e-10
EFNA3	cyan	0.898469	4.72098e-31	-0.616337	4.34071e-10
PHYHD1	cyan	0.771015	9.60195e-18	-0.616848	4.16043e-10
TACC2	cyan	0.85738	2.26469e-25	-0.616374	4.32745e-10
RHOJ	cyan	-0.63102	1.24194e-10	0.617311	4.00301e-10
EMP2	cyan	0.80632	2.15534e-20	-0.616874	4.15127e-10
CTNNA2	blue	0.697607	1.66567e-13	0.614883	4.89644e-10
SLC16A14	cyan	0.876489	9.25851e-28	-0.614468	5.06713e-10
SORT1	blue	0.752699	1.50486e-16	0.61598	4.47121e-10
ATG16L2	cyan	0.82277	8.05382e-22	-0.61691	4.139e-10
TMEM184A	cyan	0.801802	5.03311e-20	-0.622011	2.69719e-10
HMCN1	blue	0.850927	1.21381e-24	0.614316	5.13071e-10
FUCA2	cyan	-0.699128	1.40219e-13	0.61679	4.18056e-10
EMX2OS	cyan	0.84384	7.02017e-24	-0.615927	4.49108e-10
SMPDL3A	cyan	0.653788	1.55705e-11	-0.616701	4.21158e-10
EPB41L4B	cyan	0.833098	8.55605e-23	-0.614415	5.08897e-10
KLF8	cyan	0.821943	9.57691e-22	-0.613483	5.49501e-10
RP11-532F12.5	cyan	0.90014	2.4745e-31	-0.612243	6.08327e-10
LGR6	cyan	0.872183	3.45101e-27	-0.612423	5.99434e-10
FOXI1	cyan	0.543991	8.8904e-08	-0.613253	5.59972e-10
ZNF385D	blue	-0.809705	1.12503e-20	-0.613038	5.69959e-10
SCNN1G	cyan	0.795802	1.50188e-19	-0.612774	5.82433e-10
KCNN2	blue	0.696337	1.92138e-13	0.611743	6.3372e-10
CCDC78	blue	0.743179	5.73344e-16	0.612995	5.71966e-10
MIR6836 /// SNX8	lightyellow	0.835632	4.82202e-23	0.614457	5.07139e-10
MOK	blue	0.808725	1.35971e-20	0.612426	5.99297e-10
MPHOSPH9	cyan	-0.754409	1.17586e-16	0.615798	4.53935e-10
MYO9B	lightyellow	0.678195	1.36871e-12	0.615954	4.48115e-10
VIPR1	cyan	0.946736	4.09646e-42	-0.611527	6.44984e-10
TMPRSS2	cyan	0.53872	1.2491e-07	-0.616512	4.27836e-10
FAM96A	greenyellow	0.76746	1.67047e-17	0.621496	2.81743e-10
ZNF681	cyan	0.647064	2.9276e-11	-0.615082	4.81645e-10
HPS5	cyan	-0.833763	7.36726e-23	0.612615	5.90086e-10
NPNT	cyan	0.828202	2.52341e-22	-0.611271	6.58617e-10
COL23A1	cyan	0.739035	1.0077e-15	-0.612493	5.96002e-10
TRPV2	lightyellow	0.780398	2.12035e-18	0.612657	5.8807e-10
SLC1A6	cyan	0.767535	1.65121e-17	-0.610874	6.80283e-10
IL37	cyan	0.833116	8.52283e-23	-0.609951	7.33324e-10
FCGBP	cyan	0.855722	3.51318e-25	-0.609245	7.76534e-10
KCNB1	cyan	0.724678	6.56955e-15	-0.611372	6.53199e-10
STMN1	blue	0.675566	1.79839e-12	0.613427	5.52053e-10
SMYD3	cyan	-0.76324	3.18309e-17	0.611172	6.63962e-10
RAB8B	yellow	0.6253	2.03811e-10	0.610604	6.95413e-10
TCEAL2	cyan	0.766278	2.00373e-17	-0.60888	7.99772e-10
SPTLC3	cyan	0.820692	1.24261e-21	-0.609019	7.90852e-10
PHF19	lightyellow	0.763874	2.89142e-17	0.613963	5.28232e-10
LOC280665	cyan	0.567712	1.78619e-08	-0.614527	5.04227e-10
SYT17	darkorange	-0.65333	1.62626e-11	-0.609753	7.45204e-10
DPH3	greenyellow	0.713034	2.76164e-14	0.614235	5.16514e-10
PPP1R13L	cyan	0.941148	2.18838e-40	-0.607771	8.74732e-10
AGK	cyan	-0.76091	4.51803e-17	0.614158	5.19796e-10
NRAS	blue	0.647872	2.71592e-11	0.615699	4.57674e-10
ADSL	lightyellow	0.681101	1.00885e-12	0.617296	4.00818e-10
C12orf76	blue	0.831867	1.1267e-22	0.607228	9.13762e-10
RNF112	cyan	0.66051	8.15073e-12	-0.610739	6.87812e-10
CD320	lightyellow	0.85024	1.4447e-24	0.608736	8.09158e-10
PTTG1	midnightblue	0.88536	5.23732e-29	0.610606	6.95262e-10
DLK2	cyan	0.781175	1.86501e-18	-0.609442	7.64223e-10
NANP	cyan	-0.815511	3.57622e-21	0.608805	8.04646e-10
RERG	lightyellow	-0.666081	4.70706e-12	-0.606055	1.00397e-09
LOC101927703	cyan	0.656222	1.23404e-11	-0.609491	7.61184e-10
PTPLAD1	darkorange	0.900572	2.08946e-31	0.606443	9.73292e-10
CCR1	yellow	0.779061	2.64145e-18	0.606606	9.6062e-10
NTRK3	cyan	0.65749	1.09233e-11	-0.609209	7.78746e-10
SGK1	blue	0.657657	1.07493e-11	0.619827	3.24309e-10
GSTA3	cyan	0.821252	1.1061e-21	-0.604726	1.11647e-09
CRISP3	cyan	0.575977	9.90702e-09	-0.604268	1.15796e-09
ACVR2A	darkred	0.793707	2.18148e-19	-0.613871	5.32245e-10
MIR6132 /// ST7 /// ST7-OT3	blue	0.757267	7.75034e-17	0.609068	7.87715e-10
VTCN1	cyan	0.707082	5.60037e-14	-0.604602	1.12757e-09
TMEM8A	lightyellow	0.772324	7.81219e-18	0.608971	7.93922e-10
ACER1	cyan	0.859535	1.26915e-25	-0.604619	1.12603e-09
RTDR1	cyan	0.667813	3.95879e-12	-0.608496	8.25017e-10
TNFRSF25	cyan	0.79756	1.0945e-19	-0.607413	9.00284e-10
DKFZp434J0226	darkorange	-0.773408	6.57764e-18	-0.605584	1.04254e-09
ABCC2	blue	0.702671	9.35148e-14	0.604256	1.15909e-09
CHST6	cyan	-0.74509	4.40385e-16	0.603928	1.18976e-09
CHKA	blue	0.801587	5.2379e-20	0.609489	7.61279e-10
B3GALT5	cyan	0.571572	1.35912e-08	-0.603926	1.18997e-09
RP11-134L10.1	lightyellow	0.556625	3.84118e-08	0.611033	6.71531e-10
LGALSL	cyan	0.757128	7.91073e-17	-0.606107	9.99865e-10
CTBP2	blue	0.677839	1.42058e-12	0.617541	3.92698e-10
ASAH1	blue	0.831734	1.16054e-22	0.607709	8.79068e-10
ADAM12	blue	0.639039	6.09579e-11	0.603821	1.19992e-09
KCNK5	cyan	0.705815	6.49552e-14	-0.603066	1.274e-09
CNGA1	darkorange	-0.706681	5.87032e-14	-0.604166	1.16745e-09
CA13 /// LOC100507258	blue	-0.59574	2.26067e-09	-0.608801	8.04914e-10
BATF2	saddlebrown	0.822223	9.03304e-22	0.603283	1.25227e-09
SYTL1	cyan	0.918668	8.0051e-35	-0.60214	1.37091e-09
PRPS1	darkorange	0.757092	7.95262e-17	0.607605	8.86463e-10
AR	cyan	0.850571	1.32853e-24	-0.602374	1.3458e-09
ARSE	blue	0.784451	1.0791e-18	0.602375	1.34569e-09
PLA2G4F	cyan	0.889519	1.2542e-29	-0.602434	1.33943e-09
AP2B1	darkorange	0.894272	2.27964e-30	0.604392	1.14664e-09
SAMD12	cyan	0.77388	6.10141e-18	-0.60157	1.43405e-09
PARD3	blue	-0.714362	2.3529e-14	-0.604216	1.16283e-09
LOC101928717 /// SLC19A1	lightyellow	0.804093	3.28297e-20	0.603695	1.21197e-09
C1orf210	cyan	0.829939	1.72608e-22	-0.600848	1.51796e-09
CLDN1	cyan	0.827574	2.89176e-22	-0.600458	1.56521e-09
ATP6V1C1	cyan	-0.822857	7.90769e-22	0.602811	1.30006e-09
ALDH3A2	cyan	0.756308	8.91923e-17	-0.603794	1.20251e-09
BFAR	darkorange	0.880873	2.3038e-28	0.601997	1.38645e-09
AMMECR1L	blue	0.790875	3.58845e-19	0.612316	6.047e-10
OSR1	cyan	0.775224	4.92105e-18	-0.600022	1.61963e-09
CA6	green	0.801386	5.43646e-20	-0.599546	1.68127e-09
LOC101928076	cyan	0.906988	1.54623e-32	-0.599807	1.64721e-09
RP13-39P12.3	cyan	0.7062	6.21008e-14	-0.605532	1.04694e-09
SCD5	lightyellow	-0.655042	1.3816e-11	-0.606414	9.75536e-10
TRIM51	blue	0.874285	1.82662e-27	0.599133	1.73644e-09
TXNRD1	cyan	-0.808223	1.49782e-20	0.607431	8.98979e-10
LRP4	blue	-0.614044	5.24716e-10	-0.600376	1.57524e-09
KIAA1804	darkorange	-0.821605	1.02779e-21	-0.601026	1.49678e-09
TDRD7	blue	0.768273	1.47308e-17	0.601186	1.47806e-09
CACNB2	lightyellow	-0.687306	5.19786e-13	-0.606115	9.99207e-10
MEF2D	lightyellow	0.66034	8.28708e-12	0.611338	6.5503e-10
STK32A	blue	0.812384	6.66264e-21	0.599367	1.70494e-09
SLC15A4	darkorange	0.753358	1.36871e-16	0.60312	1.2686e-09
FAM222A	blue	0.810463	9.70776e-21	0.600486	1.5617e-09
ANK3	cyan	0.779816	2.33357e-18	-0.598929	1.76443e-09
IMPA1	cyan	-0.818819	1.82813e-21	0.60686	9.41226e-10
ATP1A2	cyan	0.662586	6.65152e-12	-0.598204	1.86719e-09
MYH14	cyan	0.795486	1.58949e-19	-0.598609	1.80901e-09
TCEA3	cyan	0.701952	1.01582e-13	-0.601912	1.3958e-09
MYRFL	cyan	0.680134	1.11712e-12	-0.601773	1.41119e-09
PRKD1	cyan	-0.756809	8.28947e-17	0.599782	1.65047e-09
PNPLA7	cyan	0.758228	6.72858e-17	-0.600333	1.58063e-09
LOC100505664	cyan	0.886458	3.61069e-29	-0.597635	1.95176e-09
C11orf84	lightyellow	0.744071	5.07061e-16	0.604305	1.15457e-09
PPM1L	cyan	0.725791	5.70469e-15	-0.602818	1.29932e-09
PTCSC1	blue	-0.561261	2.79824e-08	-0.600966	1.50393e-09
WWC1	cyan	0.703082	8.91853e-14	-0.599421	1.69783e-09
LIPH	green	0.870458	5.76741e-27	-0.597201	2.01864e-09
ETV5	darkorange	0.832494	9.79576e-23	0.596686	2.10102e-09
NTRK2	cyan	0.7702	1.09118e-17	-0.599047	1.74826e-09
PAQR8	blue	0.744008	5.11487e-16	0.597733	1.93692e-09
DENND2C	cyan	0.839961	1.76906e-23	-0.59927	1.7179e-09
PHTF1	greenyellow	0.769163	1.28284e-17	0.598334	1.84825e-09
PLSCR1	yellow	0.614269	5.15083e-10	0.59963	1.67021e-09
PAX3	darkorange	0.762189	3.72962e-17	0.596976	2.05435e-09
IL20RA	cyan	0.899786	2.83948e-31	-0.59545	2.31191e-09
LOC100507535	saddlebrown	0.728131	4.23085e-15	0.596308	2.16357e-09
SLC13A2	cyan	0.55655	3.86076e-08	-0.599813	1.64639e-09
MAD2L1BP	salmon	-0.754186	1.21444e-16	0.6001	1.6098e-09
METTL21A	blue	0.624501	2.1822e-10	0.599602	1.67395e-09
ASAP3	cyan	0.889743	1.15936e-29	-0.596884	2.06901e-09
SSH1	lightyellow	0.715899	1.95262e-14	0.599493	1.6882e-09
FCGR1B	yellow	0.770439	1.05104e-17	0.595156	2.36505e-09
SOCS6	blue	0.767314	1.70871e-17	0.597763	1.93232e-09
LINC00888	cyan	-0.829359	1.96024e-22	0.595718	2.26456e-09
KRT77	cyan	0.896024	1.19132e-30	-0.59345	2.69657e-09
C1orf85	darkorange	0.849777	1.62391e-24	0.59502	2.38986e-09
PHTF2	cyan	-0.722736	8.38969e-15	0.597439	1.98165e-09
DENND5B	cyan	-0.77717	3.5945e-18	0.597382	1.99054e-09
LOC100505498	blue	0.770009	1.12427e-17	0.593684	2.64863e-09
GATA3	cyan	0.898836	4.10051e-31	-0.593064	2.77756e-09
SEC22C	blue	0.764182	2.75973e-17	0.601089	1.48941e-09
ATIC	darkorange	0.90811	9.62016e-33	0.599366	1.70516e-09
CD300LF	yellow	0.70924	4.34286e-14	0.594427	2.50163e-09
GNS	darkorange	0.762863	3.36933e-17	0.595885	2.23545e-09
STEAP1B	blue	0.761774	3.96933e-17	0.592832	2.82732e-09
GPR137B	blue	0.755199	1.0485e-16	0.597976	1.90063e-09
PHYHIP	green	0.71788	1.53255e-14	-0.592974	2.7969e-09
EFHC2	blue	-0.683161	8.10924e-13	-0.593756	2.63414e-09
STRIP2	cyan	-0.764171	2.7643e-17	0.593015	2.78803e-09
LOC100132891	blue	0.721461	9.83919e-15	0.592643	2.86864e-09
BOC	cyan	0.667636	4.02979e-12	-0.595494	2.30413e-09
CNN1	cyan	0.610991	6.7382e-10	-0.592649	2.86718e-09
CNPY3	lightyellow	0.759751	5.36981e-17	0.597565	1.96232e-09
EEF2K /// LOC101930123	blue	-0.654197	1.49758e-11	-0.599011	1.75309e-09
ARSB	blue	0.774159	5.83611e-18	0.59496	2.40108e-09
KBTBD12	darkorange	-0.647491	2.81399e-11	-0.59321	2.74673e-09
ATP8B1	cyan	0.729588	3.50672e-15	-0.597475	1.97615e-09
RP11-157P1.4	cyan	0.810667	9.32915e-21	-0.592685	2.85933e-09
SPIRE1	blue	0.75687	8.21525e-17	0.593789	2.62734e-09
AJUBA	cyan	0.821197	1.11897e-21	-0.592203	2.96678e-09
RPS6KA6	green	0.765231	2.35218e-17	-0.59339	2.70899e-09
DFNA5	blue	0.663849	5.87315e-12	0.590942	3.26592e-09
SLC25A32	cyan	-0.774518	5.51075e-18	0.594944	2.40405e-09
CADM2	darkgreen	0.717198	1.66629e-14	-0.591091	3.22923e-09
EFCAB4A	green	0.806609	2.04003e-20	-0.591043	3.24096e-09
KLF5	cyan	0.853056	7.03925e-25	-0.590949	3.2641e-09
RPP25	lightyellow	0.805593	2.47414e-20	0.592209	2.96533e-09
PIGM	cyan	-0.783598	1.24537e-18	0.592349	2.93373e-09
ANKFN1	blue	-0.581183	6.7771e-09	-0.600868	1.51558e-09
KRT8	cyan	0.567394	1.82656e-08	-0.591263	3.18723e-09
KCNK7	cyan	0.898639	4.42405e-31	-0.589485	3.64762e-09
LYSMD2	yellow	0.636451	7.687e-11	0.594683	2.45291e-09
CYBA	lightyellow	0.731732	2.65481e-15	0.59594	2.22606e-09
SHANK2	cyan	0.65389	1.54201e-11	-0.589951	3.52109e-09
C5orf46	cyan	0.891748	5.6935e-30	-0.588945	3.79952e-09
TNS3	cyan	-0.665128	5.17506e-12	0.597223	2.01521e-09
ACTA2 /// ACTA2	cyan	0.606537	9.65916e-10	-0.590267	3.43771e-09
LOC100506098	green	0.763059	3.27121e-17	-0.589095	3.75682e-09
AFTPH	salmon	0.776657	3.906e-18	-0.613838	5.3369e-10
LY96	saddlebrown	0.726001	5.55415e-15	0.589634	3.60674e-09
CENPN	midnightblue	0.829086	2.08083e-22	0.590979	3.2567e-09
FZD1	cyan	0.538797	1.24296e-07	-0.589621	3.61027e-09
LOC100506022	cyan	-0.658036	1.0363e-11	0.590941	3.26628e-09
GYLTL1B	cyan	0.887738	2.32887e-29	-0.589548	3.63039e-09
KBTBD2	cyan	-0.756662	8.46991e-17	0.590868	3.28435e-09
CITED1	blue	0.765206	2.36098e-17	0.588084	4.05447e-09
ARR3	green	0.725486	5.92983e-15	-0.590409	3.401e-09
CGN	cyan	0.777596	3.35456e-18	-0.592067	2.99775e-09
RP11-747H7.3	cyan	0.803982	3.3519e-20	-0.588883	3.81735e-09
TGM3	cyan	0.838806	2.31825e-23	-0.588147	4.03524e-09
LPCAT1	darkorange	0.717664	1.5738e-14	0.59228	2.94931e-09
TUBB2B	blue	0.742022	6.71802e-16	0.588021	4.07393e-09
DYNLRB2	cyan	0.765004	2.43503e-17	-0.588451	3.944e-09
FOXD3	lightyellow	0.670844	2.91635e-12	0.59019	3.45788e-09
MYO1B	cyan	-0.674605	1.98568e-12	0.589972	3.5156e-09
PRDX4	blue	0.851763	9.80968e-25	0.59296	2.79978e-09
ALOX12	cyan	0.851683	1.0012e-24	-0.587556	4.21874e-09
PCP4	cyan	0.62076	2.99795e-10	-0.587563	4.21673e-09
ADRB1	green	0.719857	1.20103e-14	-0.589588	3.61933e-09
KLK1	cyan	0.903961	5.4054e-32	-0.588495	3.93079e-09
PITPNM3	cyan	0.911183	2.54012e-33	-0.587666	4.18405e-09
BC034636 /// CTB-113P19.4	cyan	0.772932	7.09435e-18	-0.58865	3.88532e-09
C15orf62	cyan	0.620444	3.07908e-10	-0.596106	2.19767e-09
SERPINE1	blue	0.587449	4.25283e-09	0.588035	4.0694e-09
SLC23A1	cyan	0.780911	1.94821e-18	-0.587824	4.13471e-09
USP48	blue	0.762551	3.53196e-17	0.589812	3.55851e-09
ZNF711	cyan	0.813504	5.33934e-21	-0.586681	4.50524e-09
TBX2	blue	0.784164	1.13242e-18	0.589159	3.73855e-09
CXCL1	blue	0.594665	2.45613e-09	0.58617	4.68105e-09
CTSZ	lightyellow	0.677059	1.5407e-12	0.588967	3.79323e-09
CDCA5	midnightblue	0.863981	3.7256e-26	0.589089	3.7585e-09
CLEC3B /// EXOSC7	cyan	0.760512	4.79483e-17	-0.586148	4.68892e-09
CHST10	lightyellow	0.768266	1.47464e-17	0.589908	3.53261e-09
RP11-363E7.4	cyan	0.703836	8.17441e-14	-0.589233	3.71777e-09
CYP21A1P /// CYP21A2	cyan	0.839543	1.95127e-23	-0.586047	4.72439e-09
RCAN2	cyan	0.583243	5.82109e-09	-0.586812	4.46125e-09
KIAA1024	blue	0.775751	4.52075e-18	0.585749	4.83079e-09
DUSP22 /// LOC100653247	cyan	-0.699243	1.38404e-13	0.588821	3.83544e-09
AKR1B1	darkorange	0.824578	5.49741e-22	0.587759	4.1549e-09
C11orf24	lightyellow	0.778856	2.73158e-18	0.588227	4.01113e-09
ATP2C2	cyan	0.870324	6.00131e-27	-0.585791	4.81573e-09
LOC285556	blue	0.791716	3.09768e-19	0.584602	5.262e-09
PTRH2	blue	0.762344	3.64345e-17	0.590179	3.4608e-09
PTPRK	blue	-0.734763	1.78271e-15	-0.589452	3.65665e-09
SLMO1	blue	0.633581	9.91679e-11	0.590894	3.278e-09
LOC284023	cyan	0.855472	3.75215e-25	-0.586231	4.65984e-09
NMNAT3	cyan	0.821262	1.10389e-21	-0.58967	3.59689e-09
GJB1	blue	0.769257	1.26436e-17	0.584867	5.15942e-09
GRAMD1C	cyan	0.75061	2.02861e-16	-0.584957	5.12472e-09
PRMT2	blue	0.749043	2.53288e-16	0.595957	2.22315e-09
RAP2B	blue	0.71652	1.81014e-14	0.587287	4.30516e-09
CYP4X1	cyan	0.832934	8.87738e-23	-0.584247	5.40301e-09
LPGAT1	cyan	-0.779146	2.60504e-18	0.589283	3.70393e-09
SEPHS2	blue	0.745712	4.03979e-16	0.616513	4.27774e-10
THEMIS2	yellow	0.73614	1.48508e-15	0.585592	4.88783e-09
EMX2	cyan	0.778136	3.0722e-18	-0.583849	5.5649e-09
DACT2	cyan	0.63661	7.57857e-11	-0.588978	3.79005e-09
TNNC1	blue	-0.67352	2.2199e-12	-0.58564	4.87023e-09
SGCA	cyan	0.660112	8.47305e-12	-0.588508	3.92711e-09
ZNRF2P1	blue	0.773389	6.59734e-18	0.586341	4.62158e-09
TBC1D7	blue	0.84199	1.09446e-23	0.583942	5.52695e-09
CHST14	cyan	-0.652022	1.84069e-11	0.587262	4.31314e-09
SPHK2	lightyellow	0.739836	9.0438e-16	0.588312	3.98539e-09
EPPK1	cyan	0.811918	7.30196e-21	-0.582825	6.00402e-09
TMPO-AS1	blue	0.567088	1.86624e-08	0.590663	3.33587e-09
MTHFD1	midnightblue	0.695121	2.20167e-13	0.59516	2.3643e-09
C10orf90	blue	0.698725	1.46779e-13	0.5843	5.38161e-09
SLC38A6	blue	0.737703	1.20536e-15	0.585646	4.86812e-09
CPEB2	blue	0.709198	4.36472e-14	0.588698	3.87108e-09
EVPL	cyan	0.904053	5.2069e-32	-0.581985	6.38822e-09
C7	cyan	0.814919	4.02704e-21	-0.581878	6.43889e-09
C4orf46	cyan	-0.729389	3.59806e-15	0.586783	4.47087e-09
TLE2	cyan	0.744433	4.82343e-16	-0.582859	5.98886e-09
PARM1	cyan	0.791411	3.26767e-19	-0.58331	5.79213e-09
ELF5	cyan	0.797041	1.20205e-19	-0.581139	6.79903e-09
DQX1	cyan	0.779135	2.60967e-18	-0.582811	6.01029e-09
SLC13A4	green	0.787656	6.26004e-19	-0.588029	4.07134e-09
NFIB	salmon	0.724016	7.14238e-15	-0.582554	6.12533e-09
EPHB6	cyan	0.935926	6.42978e-39	-0.581219	6.75935e-09
SLC18A2	lightyellow	-0.719918	1.19194e-14	-0.584558	5.27955e-09
FCRLA	blue	0.731974	2.57227e-15	0.580644	7.0509e-09
EMR2	blue	0.536497	1.43917e-07	0.586383	4.60703e-09
NAP1L2	cyan	0.779807	2.3371e-18	-0.581166	6.78549e-09
CAPN13	green	0.865477	2.44242e-26	-0.581594	6.57501e-09
SLC2A12	cyan	0.69615	1.96216e-13	-0.584723	5.21479e-09
ZMAT3	darkorange	0.793115	2.42218e-19	0.581767	6.49178e-09
RP3-496C20.1	cyan	0.860658	9.3495e-26	-0.581293	6.72269e-09
DEGS2	cyan	0.841111	1.3485e-23	-0.581339	6.69993e-09
FGFR3	cyan	0.901045	1.73571e-31	-0.580024	7.37908e-09
NRROS	blue	0.671496	2.72944e-12	0.581953	6.40327e-09
ADO	blue	0.584309	5.378e-09	0.592585	2.88145e-09
GNG10	blue	0.584319	5.37397e-09	0.597943	1.90553e-09
CDKN3	midnightblue	0.85235	8.44136e-25	0.580887	6.92647e-09
PTPN3	cyan	0.821344	1.08532e-21	-0.580129	7.32269e-09
RNF114	blue	0.691783	3.1882e-13	0.589211	3.72398e-09
CREM	cyan	-0.627947	1.62266e-10	0.584186	5.42731e-09
PGRMC2	lightyellow	-0.663598	6.02072e-12	-0.590508	3.37556e-09
UBL3	blue	0.83358	7.67808e-23	0.581767	6.49187e-09
PIGR	cyan	0.554002	4.58543e-08	-0.578814	8.06171e-09
LINC01314	blue	0.699878	1.28757e-13	0.578477	8.26255e-09
PRSS8	cyan	0.927647	7.93176e-37	-0.57803	8.53638e-09
LRRN1	cyan	0.666549	4.49248e-12	-0.578688	8.13668e-09
KRT33A	darkgreen	0.932627	4.71157e-38	-0.578015	8.54523e-09
LOC101927143	cyan	0.565006	2.15883e-08	-0.581741	6.50414e-09
GTF2H2 /// GTF2H2B /// GTF2H2C /// GTF2H2C_2	cyan	-0.636211	7.85297e-11	0.583887	5.54938e-09
TBC1D31	greenyellow	0.7928	2.56032e-19	0.582245	6.26702e-09
MLANA	blue	0.739648	9.27668e-16	0.578071	8.51098e-09
ANO1	cyan	0.748203	2.85133e-16	-0.594456	2.49599e-09
PRSS16	cyan	0.906565	1.84701e-32	-0.577658	8.77001e-09
LOC285902 /// ZNF273	lightyellow	-0.732556	2.38361e-15	-0.57937	7.74112e-09
SETDB1	darkorange	0.735617	1.5921e-15	0.586579	4.53971e-09
CYP3A4	green	0.696214	1.94814e-13	-0.584897	5.14787e-09
PCDH19	cyan	0.676934	1.56075e-12	-0.579676	7.56975e-09
RHOV	cyan	0.915618	3.4026e-34	-0.57813	8.47424e-09
ADH1B	cyan	0.800873	5.97684e-20	-0.576758	9.36256e-09
TMEM254	green	0.907556	1.21728e-32	-0.57849	8.25483e-09
MEGF6	cyan	0.750813	1.97074e-16	-0.578384	8.31907e-09
KLHL7	darkorange	0.673128	2.31071e-12	0.578247	8.40217e-09
FOXN1	cyan	0.916572	2.17708e-34	-0.575845	1.00022e-08
SLC4A2	lightyellow	0.859017	1.46005e-25	0.579906	7.44314e-09
PLA1A	blue	0.749907	2.2416e-16	0.575469	1.02772e-08
IL20RB	cyan	0.91	4.26414e-33	-0.575401	1.03282e-08
PDP1	cyan	-0.789512	4.54671e-19	0.577946	8.58827e-09
LINC00622	blue	0.75283	1.4767e-16	0.575673	1.0127e-08
ZNF281	darkorange	0.841609	1.19836e-23	0.577477	8.88651e-09
GAPDHS	blue	0.726293	5.35145e-15	0.575264	1.04306e-08
PRTG	blue	0.664053	5.75613e-12	0.575316	1.03919e-08
C11orf80	salmon	0.694583	2.33774e-13	-0.578887	8.01908e-09
SLC46A2	cyan	0.870507	5.68463e-27	-0.575272	1.04246e-08
FRMD5	cyan	-0.765022	2.42832e-17	0.57461	1.09342e-08
PTPRT	darkgreen	0.739667	9.25343e-16	-0.576573	9.48919e-09
KLHL6	yellow	0.775355	4.81867e-18	0.575437	1.03011e-08
EPB41L3	blue	0.622643	2.55654e-10	0.575479	1.02699e-08
PTPLA	blue	0.745758	4.01402e-16	0.578186	8.43944e-09
GLYATL1 /// LOC100287413	green	0.891216	6.88512e-30	-0.575351	1.03657e-08
ACOT7	lightyellow	0.775419	4.76948e-18	0.576855	9.29667e-09
PADI3	darkgreen	0.911717	2.00532e-33	-0.573662	1.17049e-08
PKP2	cyan	0.766037	2.07915e-17	-0.577386	8.94547e-09
MT4	blue	-0.532357	1.8687e-07	-0.58233	6.22751e-09
TNFRSF14	blue	0.730081	3.29031e-15	0.577438	8.91178e-09
IFIT3	yellow	0.698435	1.51678e-13	0.574015	1.14116e-08
MAD1L1	lightyellow	0.863878	3.83448e-26	0.573914	1.14949e-08
TUFT1	cyan	0.842053	1.07809e-23	-0.575347	1.03684e-08
LOC729680	blue	0.73767	1.21076e-15	0.573456	1.18789e-08
ARHGEF28	cyan	0.731906	2.59504e-15	-0.574682	1.08771e-08
ATP13A4	cyan	0.828575	2.32659e-22	-0.573969	1.14491e-08
GAN	cyan	0.753545	1.33234e-16	-0.575714	1.00973e-08
TRMT12	blue	0.823934	6.30214e-22	0.577982	8.56608e-09
LOC101927157	cyan	0.609744	7.45715e-10	-0.586053	4.72204e-09
CYP3A7-CYP3AP1	darkorange	-0.635094	8.67336e-11	-0.578102	8.49158e-09
OAS2	yellow	0.739754	9.14455e-16	0.571959	1.32216e-08
TMC4	green	0.784242	1.11775e-18	-0.571679	1.34879e-08
CDH22	cyan	0.662696	6.58002e-12	-0.583834	5.57125e-09
TMEM132B	darkorange	-0.615784	4.54464e-10	-0.576566	9.49355e-09
U47924.27	cyan	0.909615	5.04101e-33	-0.5711	1.40559e-08
RASSF3	blue	0.755563	9.94368e-17	0.574235	1.12327e-08
MRC2	cyan	0.839815	1.83078e-23	-0.575335	1.03775e-08
CDK4	lightyellow	0.836299	4.1396e-23	0.575637	1.01533e-08
CD207	cyan	0.851479	1.05487e-24	-0.57033	1.48454e-08
CERS2	lightyellow	0.821064	1.15036e-21	0.575573	1.02008e-08
IGF2BP3	cyan	-0.786448	7.69469e-19	0.570659	1.45028e-08
FAM182A /// FAM182B	cyan	0.73109	2.88638e-15	-0.572662	1.25739e-08
PDXP /// SH3BP1	lightyellow	0.780699	2.01755e-18	0.572018	1.31654e-08
PPT1	blue	0.768498	1.42256e-17	0.582758	6.03381e-09
TMEM125	cyan	0.927665	7.8544e-37	-0.570095	1.50949e-08
CNKSR1	cyan	0.881746	1.73536e-28	-0.570567	1.45982e-08
GGT1 /// GGT2 /// GGT3P /// GGT8P /// GGTLC1 /// GGTLC2 /// LOC100132705 /// LOC102724197	blue	-0.505105	9.58554e-07	-0.586035	4.72858e-09
M6PR	darkorange	0.897354	7.22169e-31	0.571219	1.39368e-08
FLNC	cyan	0.766175	2.03581e-17	-0.57139	1.37687e-08
EME1	midnightblue	0.791714	3.09857e-19	0.578662	8.15185e-09
CMYA5	cyan	0.709401	4.26122e-14	-0.570542	1.46243e-08
MAGI1	salmon	0.729605	3.49902e-15	-0.571601	1.35634e-08
CASZ1	cyan	0.898432	4.7887e-31	-0.570416	1.47553e-08
KTI12 /// TXNDC12	lightyellow	0.779986	2.26918e-18	0.576508	9.53393e-09
GPR157	cyan	0.85439	4.98004e-25	-0.577282	9.01323e-09
ERICH5	cyan	0.683191	8.08367e-13	-0.576815	9.3239e-09
PPM1J	cyan	0.742044	6.69827e-16	-0.572155	1.30373e-08
AGAP11	salmon	0.707548	5.30216e-14	-0.57116	1.39953e-08
TRIQK	greenyellow	0.705215	6.96543e-14	0.570282	1.4896e-08
HPS1	lightyellow	0.518369	4.40291e-07	0.571865	1.33099e-08
BMP2	cyan	0.685884	6.05983e-13	-0.569746	1.54733e-08
EDAR	cyan	0.670122	3.13767e-12	-0.569757	1.54607e-08
PLAGL1	cyan	0.832066	1.07791e-22	-0.568927	1.6396e-08
LNX1	lightyellow	-0.749058	2.52749e-16	-0.574719	1.08484e-08
C6orf132	cyan	0.879111	4.05526e-28	-0.568627	1.6747e-08
GPRC5C	cyan	0.782711	1.44477e-18	-0.573119	1.2169e-08
SUSD2	cyan	0.680866	1.03423e-12	-0.572576	1.26516e-08
GDF11	blue	0.79829	9.58744e-20	0.570312	1.48645e-08
MIR205HG	cyan	0.893718	2.79281e-30	-0.567336	1.83398e-08
AACS	green	0.881813	1.69762e-28	-0.568757	1.65934e-08
LOC101926963	cyan	-0.541916	1.01705e-07	0.571191	1.3965e-08
ARHGAP44	darkorange	-0.780891	1.95452e-18	-0.577347	8.97085e-09
ERV3-2	blue	0.608583	8.19262e-10	0.568522	1.68716e-08
ECHDC2	cyan	0.746986	3.3823e-16	-0.568752	1.65994e-08
YKT6	lightyellow	0.87675	8.53641e-28	0.571208	1.39474e-08
METTL7A	white	0.678592	1.3131e-12	-0.574952	1.06679e-08
LOC100506497	green	0.808805	1.33896e-20	-0.567603	1.7999e-08
FOXD2-AS1	lightyellow	0.62625	1.87848e-10	0.569032	1.62746e-08
SSH2	darkorange	0.634065	9.50146e-11	0.576594	9.47413e-09
CAPN6	cyan	0.767264	1.72175e-17	-0.566645	1.92514e-08
VLDLR	cyan	-0.622263	2.64027e-10	0.567075	1.86799e-08
GRTP1	cyan	0.784868	1.00585e-18	-0.569001	1.63098e-08
HELZ	blue	0.63623	7.84019e-11	0.572977	1.22935e-08
RNFT2	blue	0.642532	4.44173e-11	0.567615	1.79844e-08
SP6	cyan	0.897043	8.12307e-31	-0.566457	1.9507e-08
KIF4A	midnightblue	0.84484	5.5108e-24	0.567656	1.79326e-08
TMEM201	lightyellow	0.772213	7.95019e-18	0.570957	1.4199e-08
CEACAM6	cyan	0.635075	8.68795e-11	-0.565812	2.04067e-08
LMOD1	cyan	0.652614	1.74054e-11	-0.567229	1.84779e-08
LYPD1	lightyellow	0.641792	4.75105e-11	0.565875	2.0317e-08
MRGBP	lightyellow	0.753213	1.39761e-16	0.576378	9.62405e-09
HSD11B1	green	0.886169	3.98318e-29	-0.565297	2.11536e-08
LOC101928000	blue	0.650982	2.03033e-11	0.569079	1.6221e-08
TMEM132C	cyan	0.770764	9.98915e-18	-0.565295	2.1157e-08
KIFC2	cyan	0.7098	4.06429e-14	-0.567346	1.83271e-08
AGR2	cyan	0.713698	2.54947e-14	-0.565481	2.08849e-08
LLGL2	cyan	0.848977	1.98509e-24	-0.56834	1.70893e-08
DUOX2	cyan	0.776825	3.8016e-18	-0.565556	2.07753e-08
NUP93	lightyellow	0.804745	2.90415e-20	0.574814	1.07748e-08
HERC5	saddlebrown	0.617075	4.08234e-10	0.565826	2.03871e-08
FAM153A /// FAM153B /// LOC100507387 /// LOC102725213	cyan	0.740171	8.64282e-16	-0.56539	2.10175e-08
AP3M2	blue	0.681961	9.21137e-13	0.568251	1.71965e-08
FEN1	midnightblue	0.777827	3.23073e-18	0.56809	1.73925e-08
LEF1	lightyellow	0.601418	1.45129e-09	0.565825	2.03882e-08
MSANTD3-TMEFF1 /// TMEFF1	greenyellow	0.719627	1.23572e-14	0.567722	1.78487e-08
CKLF	saddlebrown	0.798314	9.54599e-20	0.57168	1.34864e-08
SLC25A19	lightyellow	0.758665	6.30726e-17	0.570218	1.49639e-08
GRHL2	cyan	0.887133	2.86719e-29	-0.563651	2.37208e-08
FBXW7	salmon	0.761014	4.44793e-17	-0.567669	1.79156e-08
HRK /// LOC283454	blue	0.679554	1.18729e-12	0.5633	2.43061e-08
MAGI1-IT1	blue	-0.57819	8.4373e-09	-0.575619	1.01667e-08
SH3RF2	cyan	0.914222	6.48331e-34	-0.563145	2.45682e-08
BLOC1S5-TXNDC5 /// TXNDC5	darkorange	0.814357	4.50575e-21	0.568125	1.73494e-08
GNG2	cyan	-0.736701	1.3781e-15	0.563558	2.38757e-08
GCNT2	blue	0.695831	2.03357e-13	0.565752	2.04924e-08
PRB4	cyan	0.521259	3.7e-07	-0.571133	1.4023e-08
FZD10-AS1	cyan	0.821619	1.02484e-21	-0.568252	1.71957e-08
HNRNPLL	greenyellow	0.681877	9.29411e-13	0.573272	1.20367e-08
HOPX	cyan	0.83323	8.30645e-23	-0.563361	2.42033e-08
SMAD5-AS1	cyan	0.821814	9.8389e-22	-0.56305	2.47303e-08
SAMD9	yellow	0.6181	3.74805e-10	0.563992	2.31656e-08
METRN	lightyellow	0.748231	2.84006e-16	0.564653	2.21258e-08
SLIT3	cyan	0.731902	2.59628e-15	-0.563357	2.42099e-08
RPRML	cyan	0.660644	8.04442e-12	-0.563542	2.39014e-08
THRB-IT1 /// THRB-IT1	lightyellow	-0.773713	6.26611e-18	-0.56222	2.61918e-08
ZSCAN21	cyan	-0.745833	3.97245e-16	0.569323	1.59438e-08
EDA	blue	-0.557191	3.69646e-08	-0.574072	1.13652e-08
PREX1	saddlebrown	0.751777	1.71735e-16	0.564391	2.25329e-08
BCL11A	cyan	0.861842	6.75451e-26	-0.561595	2.73468e-08
LOC102724788 /// PRODH	cyan	0.729813	3.40607e-15	-0.562347	2.59636e-08
NLGN1	blue	0.682395	8.79735e-13	0.561655	2.72336e-08
LOC100996760	cyan	0.83622	4.21533e-23	-0.560897	2.86916e-08
CRY2	cyan	0.759354	5.69605e-17	-0.565865	2.03318e-08
KRT23	cyan	0.896384	1.0409e-30	-0.560912	2.86619e-08
E2F3	darkorange	0.821192	1.12009e-21	0.565122	2.14138e-08
LINC00520	blue	0.687857	4.89644e-13	0.559988	3.05411e-08
KLC1	lightyellow	0.671558	2.71214e-12	0.568673	1.66928e-08
KCNK1	cyan	0.872332	3.29939e-27	-0.561342	2.78263e-08
HK2 /// RP11-259N19.1	blue	0.732555	2.38383e-15	0.561939	2.67049e-08
PLEKHA8P1	cyan	-0.671031	2.86131e-12	0.562977	2.48554e-08
MINPP1	blue	0.612133	6.13835e-10	0.564805	2.18927e-08
PAWR	cyan	0.725021	6.29016e-15	-0.561334	2.78428e-08
MRPL44	darkorange	0.837539	3.11129e-23	0.564831	2.18527e-08
KDELR3	cyan	-0.639783	5.70003e-11	0.560959	2.85695e-08
S100A1	blue	0.747374	3.20345e-16	0.559308	3.19951e-08
CEBPA-AS1	green	0.773089	6.91964e-18	-0.567399	1.82585e-08
NR3C2	darkorange	-0.71562	2.01991e-14	-0.560414	2.96604e-08
IFI16	cyan	-0.794298	1.96447e-19	0.563287	2.43272e-08
APBA2	lightyellow	0.611749	6.33404e-10	0.559554	3.14627e-08
CENPL	midnightblue	0.755678	9.77789e-17	0.562267	2.61072e-08
RASSF7	cyan	0.824414	5.69228e-22	-0.562479	2.57273e-08
LOC100996696 /// PABPC4	darkorange	0.698014	1.59087e-13	0.565486	2.08766e-08
PIK3C2B	cyan	0.847743	2.7005e-24	-0.561378	2.77586e-08
COTL1	darkorange	0.732306	2.46277e-15	0.559166	3.23075e-08
LINC01127	blue	-0.619947	3.21046e-10	-0.564916	2.17233e-08
KIAA0226L	yellow	0.554654	4.38848e-08	0.559926	3.06692e-08
SEMA5B	green	0.687563	5.05527e-13	-0.560485	2.9516e-08
SLC16A1	blue	0.667956	3.90245e-12	0.560943	2.86017e-08
KIF23	midnightblue	0.82877	2.22946e-22	0.560878	2.87301e-08
RRP7A /// RRP7B	cyan	0.525083	2.93203e-07	-0.559491	3.15969e-08
HCN3	green	0.747669	3.0734e-16	-0.560328	2.98355e-08
POLR3K	blue	0.719038	1.32896e-14	0.566863	1.89597e-08
ACAD9	green	0.812357	6.69759e-21	-0.562311	2.60276e-08
SCG2	blue	0.553407	4.77214e-08	0.558093	3.47645e-08
WNT16	cyan	0.732739	2.32709e-15	-0.559263	3.2094e-08
DCST2	cyan	0.617632	3.89744e-10	-0.559926	3.06693e-08
SRM	lightyellow	0.879892	3.16013e-28	0.561134	2.8229e-08
MIR4647 /// SLC35B2	lightyellow	0.790312	3.95766e-19	0.56007	3.03696e-08
PTK6	cyan	0.868702	9.65806e-27	-0.557916	3.51854e-08
PFKM	darkorange	0.812017	7.16245e-21	0.562002	2.65889e-08
GK5	lightyellow	-0.68181	9.3606e-13	-0.558567	3.36585e-08
SBSPON	cyan	0.73247	2.41057e-15	-0.558344	3.41725e-08
APH1B	cyan	-0.598957	1.76056e-09	0.564868	2.17961e-08
LOC102724387	cyan	0.679772	1.16045e-12	-0.559703	3.11432e-08
CCDC64	cyan	0.836423	4.02367e-23	-0.562054	2.64942e-08
FAM27E2 /// FAM27E3	cyan	-0.697972	1.59838e-13	0.559975	3.0568e-08
TNMD	cyan	0.695241	2.17227e-13	-0.557014	3.74096e-08
TDP1	lightyellow	0.610389	7.0764e-10	0.566238	1.98073e-08
RQCD1	darkorange	0.68903	4.31043e-13	0.564014	2.3131e-08
DNER	cyan	0.664068	5.74781e-12	-0.556362	3.91022e-08
CA14	blue	0.699286	1.37727e-13	0.556526	3.86687e-08
C9orf91	blue	0.633036	1.04051e-10	0.561221	2.80595e-08
LOC100996902	green	0.559759	3.10242e-08	-0.558722	3.33038e-08
MX2	saddlebrown	0.704721	7.37807e-14	0.557607	3.59319e-08
PANK1	green	0.811964	7.2373e-21	-0.55763	3.58768e-08
AC007362.3	cyan	-0.685479	6.32959e-13	0.558463	3.38964e-08
DFFB	cyan	-0.721687	9.56549e-15	0.560291	2.99127e-08
LRBA	cyan	0.606814	9.44694e-10	-0.565037	2.15414e-08
ANKRD35	cyan	0.924167	5.07171e-36	-0.556257	3.93819e-08
IGSF10	cyan	0.644197	3.8139e-11	-0.557031	3.73668e-08
F10	cyan	0.73674	1.37099e-15	-0.559692	3.11667e-08
LIPA	yellow	0.726599	5.14705e-15	0.565379	2.10342e-08
SLC7A7	yellow	0.8144	4.46713e-21	0.558642	3.3487e-08
MARVELD2	cyan	0.801261	5.56333e-20	-0.55672	3.81637e-08
VIT	blue	-0.747085	3.3354e-16	-0.55625	3.94e-08
NOL4L	salmon	-0.630467	1.30342e-10	0.559813	3.09083e-08
FERMT1	cyan	0.8864	3.68261e-29	-0.555363	4.18341e-08
TGM5	cyan	0.912056	1.72451e-33	-0.555076	4.26524e-08
PEBP4	blue	-0.607424	8.99471e-10	-0.558873	3.29617e-08
LOC100505549	blue	0.601154	1.48179e-09	0.558747	3.32462e-08
LOC102724017	darkorange	0.613244	5.60387e-10	0.557547	3.60805e-08
SLC7A6OS	blue	0.736233	1.46687e-15	0.570612	1.45515e-08
ZDHHC11	darkorange	-0.668818	3.57863e-12	-0.557135	3.71049e-08
TNKS1BP1	cyan	0.785416	9.16822e-19	-0.558751	3.3238e-08
FCGR2A	cyan	-0.785288	9.36924e-19	0.555847	4.04902e-08
TAF1A	cyan	-0.769096	1.29642e-17	0.55662	3.84252e-08
RTN4	blue	-0.70785	5.11743e-14	-0.562815	2.51364e-08
ARHGEF4 /// LOC101930241	cyan	0.920556	3.17452e-35	-0.556541	3.86297e-08
IFT81	blue	0.810446	9.74124e-21	0.560587	2.93095e-08
PKNOX2	blue	0.789589	4.48675e-19	0.555237	4.21922e-08
CCDC64B	cyan	0.929162	3.43359e-37	-0.554705	4.37333e-08
THRB	cyan	0.86657	1.78815e-26	-0.554375	4.47165e-08
CENPO	lightyellow	0.715856	1.96295e-14	0.565273	2.11897e-08
HS3ST4	cyan	0.5693	1.59689e-08	-0.555874	4.04162e-08
TCEAL7	cyan	0.701348	1.08871e-13	-0.554739	4.36334e-08
TINAGL1	cyan	0.764402	2.66867e-17	-0.563517	2.3943e-08
LINC00969	lightyellow	-0.657036	1.14119e-11	-0.555772	4.06939e-08
POPDC3	cyan	-0.703716	8.28868e-14	0.553481	4.74847e-08
PPP1R13B	cyan	0.817674	2.30972e-21	-0.556898	3.77074e-08
THEM4	cyan	-0.775822	4.46983e-18	0.556116	3.97592e-08
EFNA5	blue	-0.636409	7.71613e-11	-0.5547	4.37485e-08
LOC101928716	blue	0.737275	1.27644e-15	0.55293	4.92746e-08
IRF6	cyan	0.887364	2.64872e-29	-0.552964	4.91606e-08
GLYATL2	cyan	0.569974	1.52257e-08	-0.554453	4.44836e-08
ROR2	cyan	0.662001	7.04495e-12	-0.557726	3.56424e-08
AP5S1	lightyellow	0.799587	7.56802e-20	0.557437	3.63514e-08
LINC01213	green	0.674153	2.08016e-12	-0.555801	4.06158e-08
ABCC3	cyan	0.808419	1.44251e-20	-0.558103	3.47394e-08
ZSCAN9	cyan	-0.686693	5.55355e-13	0.555614	4.1132e-08
CNIH1	blue	0.575365	1.03551e-08	0.563509	2.39556e-08
PARVA	blue	0.713074	2.74852e-14	0.557604	3.59396e-08
LEF1-AS1	blue	0.750461	2.07208e-16	0.551632	5.374e-08
TPP1	lightyellow	0.65151	1.93188e-11	0.556654	3.83362e-08
SEMA4A	cyan	0.827938	2.6724e-22	-0.555227	4.22214e-08
SLCO4A1-AS1	blue	0.653303	1.63045e-11	0.551569	5.39642e-08
SHC1	lightyellow	0.747941	2.95817e-16	0.557924	3.51655e-08
MPZL3	cyan	0.816037	3.21765e-21	-0.552563	5.04998e-08
GGT6	cyan	0.937808	1.96613e-39	-0.550747	5.70037e-08
MAFG	lightyellow	0.802544	4.38581e-20	0.558645	3.34784e-08
ABHD5	green	0.862543	5.56401e-26	-0.551783	5.31999e-08
DNMBP	blue	-0.75066	2.01416e-16	-0.559079	3.25007e-08
TPM1	blue	-0.598473	1.8284e-09	-0.553637	4.69903e-08
DERA	blue	0.701598	1.05784e-13	0.558579	3.36292e-08
COL4A5	cyan	0.854906	4.35235e-25	-0.552225	5.16542e-08
TRIP13	midnightblue	0.891636	5.92705e-30	0.552395	5.10693e-08
LOC646762	cyan	-0.756496	8.67759e-17	0.551829	5.30385e-08
CHAC2	greenyellow	0.66386	5.86688e-12	0.55314	4.85849e-08
GPR143	blue	0.675995	1.72041e-12	0.550004	5.98871e-08
SRA1	lightyellow	0.805532	2.50297e-20	0.561271	2.79642e-08
P2RX7	blue	0.722635	8.49623e-15	0.551727	5.34e-08
PSAPL1	green	0.873347	2.42913e-27	-0.549663	6.12554e-08
LOC151174	blue	0.685396	6.38606e-13	0.552902	4.93642e-08
CYBB	yellow	0.749834	2.2649e-16	0.551501	5.4212e-08
LOC100506691	cyan	-0.786856	7.17766e-19	0.549663	6.12556e-08
BANCR	cyan	-0.730578	3.08481e-15	0.54887	6.45597e-08
TNFSF9	blue	0.623081	2.46297e-10	0.551726	5.34031e-08
ANKRD33B	cyan	0.676965	1.55579e-12	-0.550043	5.97313e-08
IFI6	saddlebrown	0.777118	3.62544e-18	0.549449	6.21307e-08
FOXQ1	cyan	0.888732	1.65111e-29	-0.548696	6.53053e-08
ASS1	cyan	0.904431	4.46254e-32	-0.548666	6.5433e-08
SSBP4	lightyellow	0.713171	2.71656e-14	0.555572	4.12485e-08
UBB	lightyellow	0.771308	9.17068e-18	0.585398	4.95905e-09
SLC1A2	cyan	0.722111	9.07175e-15	-0.553942	4.60367e-08
LOC101928817	salmon	0.768912	1.33405e-17	-0.55119	5.53479e-08
STAT5A	saddlebrown	0.751635	1.75263e-16	0.553857	4.63009e-08
RNF165	cyan	0.734008	1.96962e-15	-0.550251	5.89111e-08
ULK1	cyan	0.679145	1.2393e-12	-0.555777	4.06822e-08
STX19	cyan	0.747488	3.15245e-16	-0.548787	6.49119e-08
EPM2A	blue	0.671671	2.68116e-12	0.552805	4.96878e-08
BTG3	cyan	0.530218	2.13568e-07	-0.552344	5.12454e-08
DLGAP1-AS2	cyan	-0.656391	1.21419e-11	0.550574	5.76632e-08
CGGBP1	cyan	-0.707007	5.65026e-14	0.553485	4.74739e-08
FBLN1	cyan	0.744748	4.6174e-16	-0.548601	6.5716e-08
ELF3	cyan	0.704006	8.01529e-14	-0.548809	6.48205e-08
CCDC178	cyan	0.604248	1.15981e-09	-0.549088	6.36357e-08
FLJ42351 /// LOC101930279	blue	0.677336	1.49689e-12	0.553138	4.85903e-08
BRAF	cyan	-0.6663	4.60554e-12	0.551388	5.46218e-08
KRT15	cyan	0.889848	1.11732e-29	-0.547221	7.19699e-08
FAM83B	cyan	0.84131	1.28627e-23	-0.547626	7.00797e-08
CSRNP2	blue	0.63172	1.16813e-10	0.559556	3.14576e-08
EFS	cyan	0.804799	2.87496e-20	-0.547503	7.06508e-08
CKLF /// CKLF-CMTM1	saddlebrown	0.779427	2.48765e-18	0.552154	5.18987e-08
FNIP1	cyan	-0.540423	1.11983e-07	0.553079	4.87835e-08
PGBD1	cyan	-0.750972	1.92661e-16	0.549383	6.24033e-08
GPT	green	0.888522	1.77623e-29	-0.549645	6.13303e-08
GYPC	lightyellow	0.691557	3.26835e-13	0.547559	7.03885e-08
DIP2C	darkorange	0.627902	1.62901e-10	0.549585	6.15743e-08
KRT2	cyan	0.739238	9.8052e-16	-0.546311	7.64049e-08
FAM210A	cyan	-0.750096	2.18213e-16	0.548391	6.6632e-08
NBPF20	cyan	-0.769521	1.21334e-17	0.549046	6.38123e-08
CNNM1	blue	0.590645	3.34045e-09	0.548621	6.56269e-08
PYCR1	lightyellow	0.847683	2.74074e-24	0.550245	5.89356e-08
ACTA2-AS1	cyan	0.532674	1.83189e-07	-0.548329	6.69059e-08
ALG8	blue	0.676954	1.55761e-12	0.55251	5.06774e-08
A2ML1	cyan	0.747274	3.24838e-16	-0.54611	7.74137e-08
RENBP	blue	0.751938	1.67826e-16	0.547632	7.00518e-08
TBCB	lightyellow	0.770712	1.00697e-17	0.555516	4.14045e-08
CRIM1	lightyellow	-0.708164	4.93162e-14	-0.54964	6.13487e-08
G6PC3	lightyellow	0.880786	2.36961e-28	0.548984	6.40718e-08
E2F7	midnightblue	0.824526	5.55824e-22	0.54654	7.52649e-08
AGPAT6	lightyellow	0.698387	1.52501e-13	0.553334	4.79555e-08
IL34	cyan	0.745158	4.36253e-16	-0.552996	4.90552e-08
OSR2	cyan	0.849147	1.90222e-24	-0.545671	7.96718e-08
RC3H2	darkorange	0.739923	8.93783e-16	0.553928	4.60803e-08
SH2B3	cyan	-0.609547	7.57748e-10	0.548094	6.79515e-08
SEZ6L	darkgreen	0.758843	6.14387e-17	-0.545722	7.94058e-08
SLC43A3	cyan	-0.704206	7.8319e-14	0.546834	7.38242e-08
PLK1	midnightblue	0.843996	6.76105e-24	0.550257	5.88897e-08
LASP1	saddlebrown	0.776582	3.95388e-18	0.563459	2.404e-08
RNASE4	blue	-0.694867	2.26494e-13	-0.548445	6.63941e-08
LOC339803	lightyellow	0.648835	2.48282e-11	0.548314	6.69744e-08
SRD5A3-AS1	blue	0.57471	1.08555e-08	0.549795	6.07212e-08
POT1	greenyellow	0.889274	1.36644e-29	0.549754	6.08898e-08
MCM10	midnightblue	0.906944	1.57524e-32	0.548396	6.66125e-08
C3orf67	blue	0.625239	2.04868e-10	0.545244	8.19311e-08
LOC648987	blue	0.581504	6.61865e-09	0.547845	6.90739e-08
ZNF106	cyan	-0.806617	2.03707e-20	0.545553	8.0292e-08
CALU	cyan	-0.753009	1.43917e-16	0.545942	7.82713e-08
MICALCL	cyan	0.699011	1.42103e-13	-0.549026	6.38944e-08
JMJD7-PLA2G4B /// PLA2G4B	cyan	0.84114	1.33922e-23	-0.546074	7.75991e-08
CYP3A43	lightyellow	-0.591042	3.24111e-09	-0.556087	3.98377e-08
RHOBTB3	darkorange	0.792198	2.84665e-19	0.544537	8.57987e-08
FUT4	cyan	-0.562983	2.48457e-08	0.549802	6.06953e-08
KRTCAP3	cyan	0.87471	1.60361e-27	-0.54478	8.44506e-08
MLX	lightyellow	0.674599	1.98707e-12	0.55197	5.25411e-08
TNFRSF21	darkorange	0.637796	6.81557e-11	0.54506	8.29209e-08
CCDC140	blue	0.740607	8.14646e-16	0.545377	8.12183e-08
WDFY2	blue	-0.749529	2.36467e-16	-0.548769	6.49899e-08
HEBP2	cyan	0.859115	1.42193e-25	-0.54633	7.63095e-08
ALS2CL	cyan	0.889346	1.33278e-29	-0.543765	9.02198e-08
SDC4	greenyellow	-0.676601	1.61563e-12	-0.545124	8.25722e-08
LOC283713 /// OTUD7A	cyan	0.726013	5.54571e-15	-0.544194	8.77358e-08
TP53AIP1	cyan	0.910264	3.80139e-33	-0.543281	9.31023e-08
RASSF10	cyan	0.856431	2.91376e-25	-0.543247	9.33056e-08
PER2	salmon	0.78328	1.31364e-18	-0.546801	7.39864e-08
ARHGEF37	cyan	0.863632	4.10762e-26	-0.546513	7.53963e-08
SLC4A11	cyan	0.79398	2.07826e-19	-0.544408	8.65191e-08
B3GALT6	lightyellow	0.603508	1.23015e-09	0.547181	7.21623e-08
GPR133	cyan	0.560055	3.04006e-08	-0.543989	8.89147e-08
TXNDC12	blue	0.740515	8.2496e-16	0.556458	3.88496e-08
GEMIN6	lightyellow	0.674258	2.05801e-12	0.551246	5.5142e-08
HEXIM2	lightyellow	0.700289	1.22866e-13	0.546657	7.46898e-08
C1QB	yellow	0.855618	3.61091e-25	0.542903	9.54088e-08
CTPS1	midnightblue	0.75124	1.85426e-16	0.547106	7.25183e-08
DIEXF	blue	0.732553	2.38463e-15	0.549481	6.19999e-08
FAM64A	midnightblue	0.88574	4.60706e-29	0.544435	8.63704e-08
RNASEH1-AS1	darkorange	0.812942	5.96792e-21	0.545464	8.07593e-08
LGR5	cyan	0.681684	9.48567e-13	-0.543216	9.34968e-08
CYP39A1	lightyellow	-0.642487	4.45993e-11	-0.543885	8.95163e-08
C17orf58	cyan	-0.587802	4.14144e-09	0.550624	5.74712e-08
KPNA2	midnightblue	0.827086	3.21315e-22	0.547781	6.93678e-08
SMARCD1	lightyellow	0.75302	1.43699e-16	0.551764	5.32679e-08
CCDC167	lightyellow	0.839956	1.77123e-23	0.545032	8.30691e-08
SLC20A1	green	-0.627941	1.62347e-10	0.544534	8.58133e-08
MAB21L3	cyan	0.606734	9.50813e-10	-0.544029	8.86841e-08
DUSP6	cyan	-0.64861	2.5355e-11	0.546468	7.562e-08
DSG1	cyan	0.822991	7.68871e-22	-0.541344	1.05533e-07
GLDN	cyan	0.765238	2.34948e-17	-0.54316	9.38341e-08
C2orf54	cyan	0.877379	7.01125e-28	-0.541495	1.0451e-07
CAPRIN1	cyan	-0.761818	3.94315e-17	0.54931	6.2706e-08
DPY19L1	cyan	-0.825596	4.42522e-22	0.543039	9.45741e-08
EOMES	yellow	0.718104	1.49101e-14	0.54137	1.05358e-07
RAB5C	darkorange	0.811309	8.22882e-21	0.546947	7.32797e-08
MC1R	lightyellow	0.704341	7.7099e-14	0.542007	1.01108e-07
UBA2	blue	0.64141	4.91896e-11	0.553328	4.79745e-08
VIM	cyan	-0.574455	1.10561e-08	0.543883	8.95315e-08
CASQ2	cyan	0.620995	2.93924e-10	-0.541343	1.05538e-07
HSPB3	blue	-0.559195	3.22451e-08	-0.54238	9.87014e-08
BNIPL /// C1orf56	cyan	0.892163	4.9069e-30	-0.540033	1.14825e-07
TMEM74B	darkorange	-0.635884	8.08541e-11	-0.543878	8.95609e-08
STAR	cyan	0.736819	1.3566e-15	-0.542116	1.00398e-07
DGKA	cyan	0.785154	9.5834e-19	-0.542651	9.69797e-08
RP11-44F21.5	cyan	0.795824	1.49596e-19	-0.539924	1.15632e-07
HTRA2	lightyellow	0.752269	1.60071e-16	0.550071	5.96193e-08
MIR4680 /// PDCD4	lightyellow	-0.697472	1.69118e-13	-0.544351	8.68429e-08
C2orf43	cyan	-0.679111	1.24372e-12	0.546015	7.78987e-08
ARPP19	blue	0.75558	9.91938e-17	0.546115	7.73886e-08
CCBE1	cyan	0.698179	1.56144e-13	-0.540369	1.12376e-07
SLC22A3	cyan	0.76768	1.61466e-17	-0.543089	9.42656e-08
TNFSF4	cyan	-0.625243	2.04793e-10	0.540187	1.13696e-07
RGS1	yellow	0.645617	3.34686e-11	0.539328	1.20135e-07
SRI	cyan	-0.693978	2.50055e-13	0.549374	6.24405e-08
LINC01208	green	0.780941	1.93857e-18	-0.541423	1.04999e-07
SCAMP1-AS1	blue	0.615357	4.70824e-10	0.543247	9.3304e-08
CHMP4C	cyan	0.873288	2.47338e-27	-0.538704	1.25032e-07
C11orf96	lightyellow	0.57688	9.28009e-09	0.540953	1.08229e-07
RUNDC3B	cyan	0.703078	8.92316e-14	-0.540981	1.08029e-07
LOC100505498 /// TEX41	blue	0.72669	5.08767e-15	0.53868	1.25227e-07
C1QTNF6	blue	0.699534	1.33901e-13	0.543195	9.36192e-08
SYDE1	blue	0.676204	1.68348e-12	0.547647	6.99837e-08
GLI2	cyan	0.610483	7.02286e-10	-0.545182	8.22612e-08
GPR85	blue	0.712673	2.88424e-14	0.538856	1.23826e-07
CXXC5	lightyellow	0.547001	7.30184e-08	0.541923	1.01661e-07
SERPINA12	cyan	0.789543	4.52259e-19	-0.537704	1.33282e-07
DOCK7	cyan	-0.768941	1.32805e-17	0.541144	1.06901e-07
EPHX2	cyan	0.693492	2.63932e-13	-0.538377	1.27673e-07
UBE2D1	blue	0.532554	1.84576e-07	0.54489	8.38425e-08
CD83	yellow	0.74842	2.76563e-16	0.540029	1.14854e-07
PRKACB	cyan	-0.655263	1.35281e-11	0.539521	1.18659e-07
TP53TG3 /// TP53TG3B /// TP53TG3C /// TP53TG3D	blue	0.695134	2.19845e-13	0.537438	1.3556e-07
SH3GLB2	cyan	0.706396	6.06906e-14	-0.544898	8.37992e-08
PGBD4	cyan	-0.593302	2.72745e-09	0.542974	9.49731e-08
ZDHHC11 /// ZDHHC11B	darkorange	-0.642415	4.48924e-11	-0.537847	1.32069e-07
PDE10A	blue	0.620141	3.15863e-10	0.540473	1.11624e-07
PCP2	darkorange	-0.608381	8.32725e-10	-0.54705	7.27873e-08
SPECC1	blue	0.595684	2.27054e-09	0.539794	1.16597e-07
MPP7	cyan	0.832161	1.05522e-22	-0.538594	1.25918e-07
MYLK	green	0.675604	1.79128e-12	-0.53968	1.17457e-07
FLOT1	cyan	-0.743897	5.19379e-16	0.539466	1.19083e-07
HJURP	midnightblue	0.914457	5.82041e-34	0.538545	1.26314e-07
PTGS1	cyan	0.866839	1.65531e-26	-0.536547	1.43466e-07
RNF39	cyan	0.89044	9.0705e-30	-0.536089	1.47692e-07
POC1A	midnightblue	0.825462	4.55387e-22	0.540883	1.08714e-07
BSPRY	cyan	0.902718	8.92631e-32	-0.536687	1.42189e-07
ERI1	cyan	-0.666573	4.48174e-12	0.542419	9.84522e-08
PSORS1C2	cyan	0.720261	1.14233e-14	-0.535802	1.50405e-07
POLR3D	darkorange	0.748459	2.75054e-16	0.537966	1.31069e-07
SLC35C1	lightyellow	0.717984	1.51308e-14	0.549318	6.26712e-08
RP11-180N14.1	cyan	0.759537	5.54324e-17	-0.535601	1.52328e-07
FCGR1A /// FCGR1B /// FCGR1C	yellow	0.741066	7.65365e-16	0.535684	1.5153e-07
AP1M2	cyan	0.907231	1.39599e-32	-0.535727	1.51116e-07
GPX1	lightyellow	0.791847	3.02744e-19	0.539084	1.22033e-07
CFD	cyan	0.870121	6.37054e-27	-0.534973	1.58504e-07
PKIG	cyan	-0.526666	2.66063e-07	0.540838	1.09032e-07
COLGALT2	blue	0.74249	6.30158e-16	0.536489	1.43989e-07
MYO5B	darkorange	-0.598002	1.89673e-09	-0.535957	1.48931e-07
C2orf40	cyan	0.645569	3.36177e-11	-0.53443	1.64028e-07
CLSTN2	cyan	0.740257	8.54254e-16	-0.535049	1.57741e-07
EXOC2	darkorange	0.787917	5.98531e-19	0.540264	1.1313e-07
SDC3	lightyellow	0.766611	1.90403e-17	0.538609	1.25799e-07
SLC35B4	cyan	-0.735111	1.70246e-15	0.536099	1.476e-07
FAM153A /// FAM153B /// FAM153C /// LOC100507387 /// LOC101928349 /// LOC101930363	cyan	0.751216	1.86075e-16	-0.534588	1.62408e-07
HTRA4	blue	0.561497	2.75307e-08	0.535389	1.54392e-07
CDS1	cyan	0.900011	2.60194e-31	-0.534535	1.62946e-07
CXCL8	cyan	-0.62613	1.8979e-10	0.534668	1.61586e-07
MFSD12	lightyellow	0.683535	7.79312e-13	0.536392	1.44882e-07
C14orf119	blue	0.682245	8.93896e-13	0.544668	8.5067e-08
SHC4	blue	0.772326	7.80915e-18	0.534363	1.64723e-07
BC017988 /// RP11-308N19.1	blue	0.658111	1.02877e-11	0.53399	1.6864e-07
KIAA1755	blue	0.652767	1.71549e-11	0.537113	1.38395e-07
TPTEP1	darkorange	-0.557765	3.55475e-08	-0.536588	1.43084e-07
MSC	lightyellow	0.578067	8.51314e-09	0.535056	1.57675e-07
FAM118B	blue	0.638215	6.56446e-11	0.538085	1.30077e-07
COPS8	cyan	-0.769439	1.229e-17	0.539175	1.21318e-07
NDNF	cyan	0.584032	5.48981e-09	-0.535206	1.56189e-07
GPC1	cyan	0.734485	1.84949e-15	-0.537038	1.39054e-07
TMEM251	blue	0.730869	2.97058e-15	0.537461	1.35356e-07
DAB2 /// LOC101926921	cyan	-0.52706	2.59682e-07	0.536897	1.40309e-07
ALOXE3	cyan	0.86898	8.90598e-27	-0.534119	1.67274e-07
MAGED2	blue	0.782906	1.39831e-18	0.539577	1.18238e-07
LY6G6C	cyan	0.872584	3.05908e-27	-0.53339	1.7513e-07
A1BG-AS1	lightyellow	0.734331	1.88743e-15	0.539515	1.18705e-07
EFEMP1	cyan	0.695908	2.01609e-13	-0.534324	1.65132e-07
KATNAL1	cyan	-0.641115	5.05269e-11	0.539994	1.15112e-07
SCNN1B	cyan	0.890018	1.05258e-29	-0.533699	1.7176e-07
WNT7B	cyan	0.587647	4.19001e-09	-0.550315	5.86613e-08
LINC00992 /// LINC00992	cyan	0.742764	6.06958e-16	-0.535495	1.53357e-07
CCL4	yellow	0.910638	3.22768e-33	0.533548	1.734e-07
SPINT1	cyan	0.828648	2.28968e-22	-0.534514	1.63168e-07
STARD5	cyan	0.883773	8.90744e-29	-0.534167	1.66777e-07
BBOX1	cyan	0.856446	2.90233e-25	-0.532664	1.83302e-07
ZFAND3	lightyellow	0.820267	1.35701e-21	0.539724	1.17123e-07
FZD10	cyan	0.886288	3.82636e-29	-0.533032	1.79115e-07
FAM216A	cyan	-0.747449	3.16994e-16	0.535218	1.56068e-07
SEC14L5	cyan	0.650789	2.06747e-11	-0.535209	1.5616e-07
SLC52A1	cyan	0.696853	1.81315e-13	-0.535149	1.5675e-07
DBF4	greenyellow	0.847518	2.85498e-24	0.535241	1.55837e-07
PFAS	blue	0.730818	2.98999e-15	0.538272	1.28538e-07
KHDRBS3	cyan	-0.819854	1.47787e-21	0.533008	1.79382e-07
POMP	darkorange	0.5866	4.53264e-09	0.548737	6.51263e-08
IL1R2	cyan	0.82138	1.07701e-21	-0.532233	1.88325e-07
SRRD	lightyellow	0.647196	2.8919e-11	0.546099	7.74736e-08
ABHD12B /// MIR4454	cyan	0.834117	6.80146e-23	-0.531416	1.98197e-07
RAPGEF5	cyan	0.699883	1.28696e-13	-0.53435	1.64858e-07
TPST1	cyan	-0.667764	3.97842e-12	0.534576	1.62526e-07
PPP1R26	blue	0.625772	1.95711e-10	0.537078	1.387e-07
EPHA7	cyan	0.572408	1.2804e-08	-0.532878	1.80858e-07
CCL8	yellow	0.823047	7.59853e-22	0.531554	1.96495e-07
NGEF	cyan	0.762803	3.4003e-17	-0.531679	1.94965e-07
RHBDL2	cyan	0.77125	9.25374e-18	-0.534962	1.58614e-07
DBNDD1	lightyellow	0.720805	1.06772e-14	0.532146	1.89353e-07
WDR35	greenyellow	0.842893	8.81863e-24	0.534309	1.65284e-07
IFNAR2	blue	0.546581	7.50608e-08	0.537543	1.34652e-07
SERHL /// SERHL2	cyan	0.575693	1.01129e-08	-0.530996	2.03464e-07
C10orf2	blue	0.612463	5.97464e-10	0.537365	1.36187e-07
LSM10	lightyellow	0.831704	1.16827e-22	0.536705	1.42025e-07
IRX4	cyan	0.88161	1.81378e-28	-0.5304	2.11154e-07
LRWD1 /// MIR4467	lightyellow	0.804571	3.00082e-20	0.537064	1.38826e-07
COL7A1	cyan	0.824069	6.12409e-22	-0.531449	1.97784e-07
DES /// SUPT20H	cyan	0.580814	6.96361e-09	-0.531227	2.00545e-07
RBL1	greenyellow	0.657902	1.04975e-11	0.538158	1.29477e-07
AL833181	cyan	0.822193	9.08916e-22	-0.529839	2.1866e-07
KLF4	cyan	0.685055	6.62383e-13	-0.531212	2.00739e-07
NOTCH3	cyan	0.776994	3.69899e-18	-0.537353	1.36292e-07
COPRS	lightyellow	0.684069	7.36097e-13	0.538158	1.29476e-07
NUDCD1	cyan	-0.801615	5.21128e-20	0.533036	1.79068e-07
EGFL8 /// PPT2	lightyellow	0.738326	1.10864e-15	0.532875	1.80893e-07
SPP1	cyan	-0.647604	2.78449e-11	0.529067	2.29394e-07
CIART	cyan	0.594537	2.48051e-09	-0.530776	2.06268e-07
CNP	darkorange	0.697837	1.62298e-13	0.534282	1.65567e-07
AKIP1	lightyellow	0.658811	9.61456e-12	0.540903	1.08573e-07
RAB26	darkorange	-0.666529	4.50121e-12	-0.533501	1.73911e-07
CNDP2	blue	0.643179	4.18687e-11	0.532478	1.85454e-07
ST6GALNAC3	blue	0.624575	2.1685e-10	0.529085	2.29135e-07
ATP8B2	lightyellow	0.714106	2.42694e-14	0.531994	1.91155e-07
LOC654780	blue	-0.617203	4.03921e-10	-0.544509	8.59524e-08
EPHA5-AS1	blue	0.623849	2.30711e-10	0.53108	2.02397e-07
DOK1	saddlebrown	0.7438	5.26391e-16	0.539767	1.16803e-07
TMEM246	cyan	0.696907	1.80217e-13	-0.529198	2.27539e-07
ST3GAL4-AS1	blue	0.693581	2.6132e-13	0.529701	2.20542e-07
ABCD1	lightyellow	0.714876	2.21113e-14	0.529353	2.25366e-07
GPR158	blue	0.649437	2.34705e-11	0.527744	2.48961e-07
MGAT5	cyan	-0.726302	5.34582e-15	0.539842	1.16242e-07
CYTH3	salmon	-0.705156	7.01411e-14	0.537462	1.35348e-07
GRB7	cyan	0.837736	2.97238e-23	-0.532118	1.89683e-07
AZGP1 /// AZGP1P1	cyan	0.713904	2.48693e-14	-0.527687	2.49829e-07
SLC23A2	blue	0.787669	6.24591e-19	0.529384	2.24928e-07
SDR42E1	cyan	0.891906	5.38046e-30	-0.527535	2.52195e-07
IGSF6	yellow	0.845216	5.02802e-24	0.529798	2.19224e-07
ITGA2	blue	-0.553253	4.82192e-08	-0.531207	2.00798e-07
HPCAL1	lightyellow	0.720937	1.05036e-14	0.529777	2.19497e-07
SMS	cyan	-0.743856	5.22274e-16	0.534437	1.63959e-07
SUGCT	lightyellow	0.641281	4.97695e-11	0.530305	2.1241e-07
ZWINT	midnightblue	0.844631	5.79725e-24	0.534692	1.61339e-07
PAK6	cyan	0.80995	1.07278e-20	-0.527223	2.5709e-07
CREB3L2	cyan	-0.61875	3.54958e-10	0.532862	1.8104e-07
SPC25	midnightblue	0.861137	8.20003e-26	0.527834	2.47574e-07
CTSS	yellow	0.769536	1.21043e-17	0.527383	2.54559e-07
IPPK	cyan	0.852159	8.86541e-25	-0.531381	1.98631e-07
SH3YL1	darkred	0.742561	6.24011e-16	-0.534863	1.59612e-07
TFIP11	lightyellow	0.609684	7.49335e-10	0.540219	1.13461e-07
FAM27B /// FAM27C	lightyellow	0.689244	4.21095e-13	0.527998	2.45077e-07
MUC15	cyan	0.743178	5.73399e-16	-0.526179	2.74137e-07
GUCY2C	cyan	0.542038	1.00907e-07	-0.531903	1.9225e-07
CAP1	lightyellow	0.616156	4.40637e-10	0.54563	7.9888e-08
IFI35	yellow	0.549625	6.14101e-08	0.527116	2.58787e-07
TRIM29	cyan	0.873664	2.20692e-27	-0.52591	2.78714e-07
LYPD8	blue	0.732558	2.38284e-15	0.52658	2.67465e-07
C1orf106	cyan	0.912181	1.63091e-33	-0.525651	2.83171e-07
ATG9B	cyan	0.873161	2.56997e-27	-0.528024	2.44696e-07
RYR3	cyan	0.563314	2.42822e-08	-0.526092	2.75615e-07
SNCAIP	cyan	0.771505	8.88981e-18	-0.528923	2.31444e-07
NFKBIE	saddlebrown	0.715445	2.06336e-14	0.528596	2.36179e-07
HDHD1	blue	0.66022	8.38462e-12	0.52731	2.55718e-07
KRTAP9-2 /// KRTAP9-8	darkgreen	0.933432	2.92593e-38	-0.524882	2.96833e-07
JUP	cyan	0.865829	2.20981e-26	-0.525392	2.87711e-07
SERTAD4	cyan	0.790867	3.59311e-19	-0.525616	2.83788e-07
E2F6	salmon	-0.687003	5.37093e-13	0.530965	2.03855e-07
SLC27A6	darkgreen	0.823497	6.91201e-22	-0.524844	2.97516e-07
CKS2	midnightblue	0.905626	2.73032e-32	0.527879	2.4689e-07
LHFPL3-AS1	blue	0.770171	1.09613e-17	0.524046	3.12387e-07
CSPG4	blue	0.744512	4.77059e-16	0.524879	2.96879e-07
PRDX2	green	0.794859	1.77773e-19	-0.531404	1.9834e-07
CD68 /// LOC101928634 /// SNORA67	saddlebrown	0.703911	8.10419e-14	0.526313	2.71899e-07
GRHL1	cyan	0.865863	2.18803e-26	-0.524423	3.05282e-07
TFCP2L1	cyan	0.835734	4.71113e-23	-0.523904	3.15092e-07
IKBIP	greenyellow	0.875081	1.43118e-27	0.525721	2.81954e-07
MPV17	lightyellow	0.738699	1.05446e-15	0.534594	1.62341e-07
LOC101929777 /// WNT3	cyan	0.680326	1.09474e-12	-0.527103	2.59004e-07
AK055981 /// RP11-617F23.1	cyan	0.807287	1.79251e-20	-0.524655	3.00969e-07
ANGPTL6	saddlebrown	0.658599	9.81331e-12	0.532305	1.87473e-07
AGPS	green	-0.748666	2.67141e-16	0.526351	2.71264e-07
ZBTB10	cyan	-0.739496	9.46926e-16	0.525195	2.91194e-07
LOC100506314	cyan	0.73972	9.1876e-16	-0.525915	2.78616e-07
HEY1	blue	0.598282	1.85586e-09	0.525358	2.88298e-07
CPPED1	cyan	-0.662285	6.85142e-12	0.527673	2.5005e-07
CAMKK1	cyan	0.746874	3.43528e-16	-0.529594	2.22019e-07
ITM2C	darkorange	0.824761	5.28761e-22	0.524039	3.12516e-07
ADIPOQ	cyan	0.646159	3.18341e-11	-0.522352	3.46292e-07
TLR5	cyan	0.768983	1.31934e-17	-0.525053	2.93748e-07
NDFIP2	cyan	0.555056	4.27115e-08	-0.530156	2.1439e-07
LCE2B	cyan	0.809975	1.06757e-20	-0.522162	3.503e-07
CLCA4	cyan	0.692403	2.97718e-13	-0.522413	3.45005e-07
UBXN8	greenyellow	0.723554	7.57041e-15	0.524055	3.12217e-07
AZGP1	cyan	0.736933	1.33615e-15	-0.522472	3.43782e-07
DNAJC22	cyan	-0.720209	1.14977e-14	0.52348	3.2335e-07
MIR210HG	cyan	0.765071	2.41045e-17	-0.52297	3.33536e-07
NEBL-AS1	green	0.650849	2.05591e-11	-0.525585	2.84323e-07
FYN	cyan	-0.63915	6.03495e-11	0.525705	2.8224e-07
SDSL	lightyellow	0.842037	1.08204e-23	0.524546	3.02989e-07
RP3-406A7.7	cyan	0.85557	3.65722e-25	-0.522379	3.45718e-07
GJB3	cyan	0.896036	1.18567e-30	-0.52182	3.57643e-07
POF1B	cyan	0.829654	1.83756e-22	-0.521781	3.58488e-07
C1QC	yellow	0.789484	4.56922e-19	0.522526	3.4266e-07
ZBTB7C	cyan	0.919272	5.97055e-35	-0.521456	3.65618e-07
ACTG2	cyan	0.608508	8.24228e-10	-0.521259	3.69991e-07
DRAM1	cyan	-0.624736	2.13879e-10	0.524323	3.07139e-07
PPL	cyan	0.895386	1.51072e-30	-0.521209	3.71103e-07
C1orf116	cyan	0.911203	2.51779e-33	-0.521074	3.74161e-07
NAGA	lightyellow	0.728145	4.22293e-15	0.526424	2.70046e-07
TDO2	yellow	0.632561	1.08494e-10	0.520897	3.78168e-07
BRI3	lightyellow	0.766781	1.8549e-17	0.52629	2.72276e-07
TSHZ2	blue	-0.78252	1.49143e-18	-0.52321	3.28696e-07
PDE3B	cyan	-0.679719	1.16687e-12	0.521491	3.64828e-07
CGNL1 /// LOC101930344 /// LOC101930349	cyan	0.806522	2.07419e-20	-0.521579	3.629e-07
RAB7A	darkred	-0.759383	5.67137e-17	0.534486	1.63449e-07
AHNAK2	cyan	0.724229	6.95241e-15	-0.520928	3.77464e-07
ENTPD3	cyan	0.800316	6.6215e-20	-0.520889	3.7836e-07
LOC100506538 /// NDUFAF6	blue	0.679597	1.18191e-12	0.528195	2.42122e-07
KIAA1524	greenyellow	0.772718	7.33886e-18	0.523438	3.24176e-07
IRX2	cyan	0.817535	2.37577e-21	-0.521145	3.72551e-07
LOC100505782	darkgreen	0.787449	6.48603e-19	-0.525466	2.8641e-07
AIM1L	cyan	0.866299	1.93213e-26	-0.523025	3.32421e-07
TNS4	cyan	0.884642	6.66574e-29	-0.520538	3.86456e-07
ALDH1A3	blue	0.731703	2.66485e-15	0.523047	3.31977e-07
LINC-PINT	greenyellow	0.755669	9.79201e-17	0.522682	3.39428e-07
ELMOD1 /// LOC643923	cyan	0.821472	1.05673e-21	-0.519794	4.04189e-07
OSBPL9	greenyellow	0.790616	3.75379e-19	0.52458	3.02356e-07
TMEM14A	blue	0.710905	3.56389e-14	0.526157	2.74509e-07
C2orf44	cyan	-0.717785	1.55055e-14	0.523601	3.20976e-07
ADCY5	cyan	0.597734	1.93672e-09	-0.533026	1.79186e-07
PALB2	darkorange	0.686922	5.41776e-13	0.531324	1.99338e-07
ZNF330	cyan	-0.703968	8.0511e-14	0.526464	2.69387e-07
PRB3	green	0.806018	2.28275e-20	-0.52332	3.26503e-07
EPOR /// RGL3	green	-0.642905	4.29289e-11	0.522898	3.35007e-07
MYCL	cyan	0.743394	5.56628e-16	-0.522516	3.42868e-07
TMEM230	darkorange	0.886116	4.05596e-29	0.522203	3.49437e-07
LOC100507194	blue	0.684848	6.77226e-13	0.519651	4.07674e-07
NCBP2	darkorange	0.680963	1.02366e-12	0.529467	2.23777e-07
CTD-2561B21.11	blue	0.672125	2.56006e-12	0.520808	3.80204e-07
GALNT16	cyan	0.750623	2.02478e-16	-0.521338	3.68239e-07
ARPC5	darkorange	0.757295	7.71804e-17	0.525889	2.79061e-07
MANSC1	cyan	0.771247	9.25877e-18	-0.523425	3.2442e-07
ARHGEF19	cyan	0.788696	5.23497e-19	-0.520465	3.88158e-07
FAT3	lightyellow	-0.599225	1.72396e-09	-0.518931	4.25686e-07
GPRIN1	lightyellow	0.689591	4.0545e-13	0.525642	2.83321e-07
HAPLN3	yellow	0.73207	2.53991e-15	0.521771	3.58714e-07
UBE2J1	cyan	-0.634312	9.29633e-11	0.527294	2.55966e-07
ENTHD1	blue	0.643472	4.07601e-11	0.518097	4.47524e-07
MMP28	cyan	0.836436	4.0113e-23	-0.519606	4.08766e-07
THSD4	cyan	0.652099	1.82742e-11	-0.51953	4.10635e-07
CAPN3	blue	0.68894	4.35295e-13	0.51846	4.37887e-07
USP11	lightyellow	0.807675	1.66394e-20	0.523542	3.2212e-07
MIR4697 /// MIR4697HG	blue	-0.663255	6.22762e-12	-0.521925	3.55379e-07
LRRC17	cyan	0.559994	3.05282e-08	-0.521072	3.74194e-07
WDR81	lightyellow	0.686822	5.47688e-13	0.526004	2.77107e-07
ACTR2	darkred	-0.763936	2.86446e-17	0.521853	3.56922e-07
ACBD6	lightyellow	0.62445	2.19174e-10	0.531778	1.93758e-07
LCP2	yellow	0.768246	1.47939e-17	0.519044	4.22825e-07
KRTAP11-1	darkgreen	0.971138	8.17813e-53	-0.517084	4.75423e-07
NETO2	blue	0.540417	1.12024e-07	0.518799	4.29088e-07
P2RX4	lightyellow	0.694762	2.29158e-13	0.519857	4.02638e-07
GDF15	blue	0.736037	1.50571e-15	0.517208	4.7194e-07
DTX3L	yellow	0.729503	3.54532e-15	0.522049	3.52711e-07
MAN2B1	lightyellow	0.545332	8.14599e-08	0.523284	3.27228e-07
AIMP2	lightyellow	0.78894	5.01963e-19	0.528534	2.37098e-07
TMEM170A	darkorange	0.653833	1.55044e-11	0.521236	3.7051e-07
SEC14L3	green	0.706281	6.15141e-14	-0.522248	3.48476e-07
FAM57A	cyan	0.690779	3.56015e-13	-0.519286	4.16724e-07
KCTD1	cyan	0.692593	2.91532e-13	-0.519374	4.14525e-07
NLK	cyan	-0.777641	3.32999e-18	0.518615	4.33828e-07
KRTAP3-1	darkgreen	0.953691	1.51806e-44	-0.516197	5.01231e-07
CD1A	cyan	0.796719	1.27386e-19	-0.516316	4.97696e-07
MRPL17	lightyellow	0.806476	2.09241e-20	0.523819	3.16738e-07
AF070581	cyan	0.595441	2.31356e-09	-0.518939	4.25493e-07
MSI2	cyan	-0.751531	1.77889e-16	0.519055	4.22535e-07
GTF2H2 /// GTF2H2B /// GTF2H2C	darkorange	0.755332	1.02833e-16	0.518213	4.44407e-07
ASUN	greenyellow	0.820686	1.24409e-21	0.517344	4.68108e-07
AKIRIN2	yellow	0.532612	1.83896e-07	0.526765	2.64436e-07
EFNA1	yellow	-0.62798	1.618e-10	-0.519287	4.16695e-07
LOC100506325 /// LOC102724532	cyan	0.535139	1.56846e-07	-0.517071	4.75797e-07
BC017398 /// CTD-2314B22.3 /// DQ786293 /// DUXAP10 /// LL22NC03-N64E9.1	cyan	-0.80375	3.50159e-20	0.515242	5.3049e-07
SNHG16 /// SNORD1A /// SNORD1C	darkorange	0.829393	1.94557e-22	0.521797	3.58149e-07
GMFB	blue	0.586662	4.51179e-09	0.523219	3.2853e-07
H2AFV	cyan	-0.788493	5.42164e-19	0.524764	2.98985e-07
DIABLO	darkorange	0.703664	8.33886e-14	0.527376	2.54671e-07
CD34	cyan	0.746978	3.38577e-16	-0.515924	5.09436e-07
SH2D2A	yellow	0.782141	1.58851e-18	0.515781	5.13783e-07
LOC100505812	blue	0.543214	9.35044e-08	0.51958	4.09413e-07
SLC26A7	lightyellow	-0.614475	5.06403e-10	-0.514978	5.38844e-07
CENPF	midnightblue	0.866067	2.06453e-26	0.516483	4.92772e-07
AC092620.2	darkorange	-0.756295	8.93637e-17	-0.516124	5.03422e-07
FARP2	lightyellow	0.696421	1.90346e-13	0.51656	4.90533e-07
KIF2C	midnightblue	0.923451	7.34912e-36	0.516894	4.80857e-07
AS3MT	blue	-0.527557	2.51842e-07	-0.515992	5.07376e-07
AIM1	cyan	0.833244	8.28103e-23	-0.514376	5.58412e-07
CALCOCO1	cyan	0.698	1.59338e-13	-0.5199	4.01595e-07
DOPEY2	green	0.735918	1.52958e-15	-0.521632	3.61736e-07
MDFIC	blue	0.657012	1.14383e-11	0.516083	5.04633e-07
SLC7A5	lightyellow	0.708938	4.50113e-14	0.516355	4.96544e-07
PSAP	darkorange	0.749781	2.282e-16	0.518448	4.38208e-07
PARD3-AS1	darkorange	-0.648928	2.46132e-11	-0.515295	5.28814e-07
DUXAP10 /// LINC01296	cyan	-0.849836	1.59993e-24	0.513412	5.91121e-07
PTH1R	cyan	0.748271	2.82421e-16	-0.516642	4.88136e-07
MARS /// MIR6758	lightyellow	0.568733	1.66221e-08	0.521817	3.57714e-07
MS4A4A	yellow	0.657919	1.04806e-11	0.513953	5.72558e-07
LOC101929118	green	0.84796	2.55868e-24	-0.514369	5.58636e-07
ABL2	darkorange	0.829395	1.94486e-22	0.513943	5.72871e-07
LRR1	midnightblue	0.691279	3.36987e-13	0.530175	2.14133e-07
BOLA3	blue	0.686843	5.46427e-13	0.521562	3.63283e-07
METTL9	blue	0.717362	1.63304e-14	0.517949	4.51481e-07
AK022793 /// BC043213 /// CTB-175P5.4	green	0.712835	2.82849e-14	-0.515558	5.20622e-07
WFDC5	cyan	0.843761	7.15531e-24	-0.512503	6.23604e-07
LOC692247	darkorange	-0.783743	1.21549e-18	-0.517169	4.73023e-07
CRB3	cyan	0.823862	6.39856e-22	-0.515987	5.0752e-07
ELP3	darkorange	0.727621	4.51678e-15	0.522427	3.44714e-07
CEBPA	cyan	0.878691	4.63497e-28	-0.512783	6.13422e-07
CKMT2	cyan	0.551046	5.58812e-08	-0.512623	6.19227e-07
YRDC	lightyellow	0.723945	7.20586e-15	0.518502	4.36781e-07
ID4	lightyellow	-0.514	5.70944e-07	-0.513378	5.9231e-07
L3HYPDH	cyan	-0.656993	1.14591e-11	0.515176	5.32567e-07
GJB5	cyan	0.841028	1.37536e-23	-0.511814	6.49384e-07
GZF1	blue	0.669114	3.47364e-12	0.522514	3.4291e-07
LOC283278 /// PLEKHA7	cyan	0.766143	2.04582e-17	-0.513137	6.00795e-07
ATP6V1C2	cyan	0.851893	9.48978e-25	-0.511519	6.60694e-07
TMPRSS6	cyan	0.649773	2.27446e-11	-0.517115	4.74553e-07
KLHL12	cyan	-0.742325	6.44558e-16	0.522318	3.47006e-07
SUPT3H	cyan	-0.607882	8.66929e-10	0.513665	5.82378e-07
CORIN	blue	-0.711911	3.16005e-14	-0.513059	6.0356e-07
METTL13	blue	0.751493	1.78871e-16	0.51917	4.19636e-07
KIAA1671	blue	-0.6292	1.45555e-10	-0.51961	4.08673e-07
ZHX1-C8orf76	blue	0.648888	2.47062e-11	0.515389	5.25898e-07
LOC283194	white	0.654734	1.42285e-11	-0.520953	3.7689e-07
IL24	blue	0.599378	1.70344e-09	0.510806	6.88864e-07
RHOBTB2	lightyellow	0.81318	5.69327e-21	0.51394	5.72989e-07
ADORA2A-AS1	green	0.846105	4.04521e-24	-0.523715	3.1875e-07
ZNF750	cyan	0.859005	1.46462e-25	-0.510026	7.20959e-07
CCDC43	cyan	-0.670703	2.95815e-12	0.516517	4.9179e-07
ZNF322	cyan	-0.824146	6.02552e-22	0.513519	5.87404e-07
LRRC18	cyan	0.532357	1.86866e-07	-0.517297	4.69426e-07
LPIN2	cyan	-0.632911	1.05207e-10	0.515219	5.31208e-07
BTNL9	blue	-0.688437	4.59757e-13	-0.514852	5.42895e-07
DES	cyan	0.502344	1.12247e-06	-0.511407	6.65067e-07
EMC8	lightyellow	0.783024	1.37095e-18	0.517931	4.51973e-07
KLHL15	cyan	-0.751528	1.77956e-16	0.51653	4.91408e-07
PTPN18	lightyellow	0.748838	2.60749e-16	0.523412	3.2469e-07
EPS8L1	cyan	0.872426	3.20818e-27	-0.510314	7.08939e-07
LOC101927027	cyan	-0.753833	1.27806e-16	0.516247	4.99732e-07
LOC340357	blue	0.606258	9.87837e-10	0.510031	7.20757e-07
ISY1-RAB43 /// RAB43	lightyellow	0.549879	6.03852e-08	0.517264	4.70352e-07
C2orf15	darkorange	-0.536083	1.47752e-07	-0.519838	4.03104e-07
URM1	lightyellow	0.691512	3.28445e-13	0.516953	4.79155e-07
DKK2	cyan	0.664757	5.36898e-12	-0.50951	7.42993e-07
STIM1	salmon	0.764979	2.4442e-17	-0.516542	4.91042e-07
FOXF2	blue	0.675161	1.87518e-12	0.509268	7.53516e-07
ELOVL4	cyan	0.877978	5.80783e-28	-0.508776	7.75378e-07
KRT74	darkgreen	0.944314	2.41515e-41	-0.509271	7.53388e-07
PGAP2	cyan	0.602151	1.36967e-09	-0.512757	6.14375e-07
RP1-228H13.5	blue	0.57385	1.15479e-08	0.511709	6.53399e-07
FAM167A	cyan	0.787314	6.63676e-19	-0.50992	7.25438e-07
SLC6A10P /// SLC6A10PB /// SLC6A8	lightyellow	0.768463	1.43043e-17	0.510333	7.08179e-07
GUCY2D	cyan	0.668354	3.74956e-12	-0.511796	6.50067e-07
DOCK10	yellow	0.624783	2.13018e-10	0.512614	6.19581e-07
KCTD21	blue	0.569333	1.59323e-08	0.510711	6.9269e-07
SLN	darkgreen	0.747431	3.17782e-16	-0.509609	7.38694e-07
TP63	cyan	0.731802	2.63052e-15	-0.512173	6.35828e-07
RDH13	cyan	0.720779	1.07113e-14	-0.521147	3.72513e-07
GSE1	blue	-0.596937	2.06044e-09	-0.516186	5.01574e-07
LCT	green	0.84967	1.66829e-24	-0.509823	7.29562e-07
SUPT4H1	darkorange	0.798355	9.47563e-20	0.517614	4.60627e-07
LINC00461 /// MIR9-2	cyan	-0.678591	1.31322e-12	0.508179	8.02732e-07
SRGN	yellow	0.716494	1.81589e-14	0.508643	7.81402e-07
CXCL13	yellow	0.81874	1.85778e-21	0.507433	8.38166e-07
SLC6A8	lightyellow	0.778997	2.66912e-18	0.509491	7.43809e-07
MMP17	lightyellow	0.693167	2.73602e-13	0.510605	6.97004e-07
FRY	darkorange	-0.581652	6.54709e-09	-0.510985	6.81684e-07
PPP3CA	lightyellow	-0.671375	2.76306e-12	-0.516996	4.77941e-07
IL18	cyan	0.768949	1.3263e-17	-0.507658	8.27314e-07
VAT1	lightyellow	0.820123	1.39799e-21	0.513215	5.98038e-07
NMU	cyan	0.774886	5.19502e-18	-0.507536	8.33194e-07
MLEC	darkred	-0.76274	3.43272e-17	0.513627	5.83665e-07
C1orf158	green	0.855083	4.15518e-25	-0.507711	8.24811e-07
CDH19	cyan	-0.77058	1.02806e-17	0.507063	8.56283e-07
RNF144A-AS1	blue	0.619891	3.22555e-10	0.50814	8.04565e-07
FAM220A	blue	0.714481	2.31937e-14	0.51838	4.39983e-07
NARS2	cyan	-0.659483	9.0078e-12	0.508368	7.93961e-07
REEP1	cyan	0.707746	5.18059e-14	-0.509057	7.62836e-07
PRDM6	cyan	0.505511	9.36444e-07	-0.508616	7.82649e-07
DIRAS3	green	0.77536	4.81428e-18	-0.507514	8.34282e-07
CNIH3	blue	0.706514	5.98576e-14	0.507928	8.14497e-07
LINC00933	darkorange	-0.735029	1.72103e-15	-0.509832	7.29161e-07
RAD51D	darkorange	0.783804	1.20301e-18	0.514168	5.65336e-07
SLC2A6	yellow	0.556793	3.79759e-08	0.509122	7.59948e-07
COBLL1	lightyellow	-0.615444	4.67421e-10	-0.509958	7.23857e-07
CITED4	cyan	0.688916	4.36401e-13	-0.51051	7.00901e-07
ARHGEF11	lightyellow	0.749952	2.22719e-16	0.510307	7.09259e-07
IRF4	blue	0.597004	2.0499e-09	0.509024	7.6428e-07
ZNF696	cyan	-0.684249	7.22063e-13	0.516113	5.03739e-07
JAM2	cyan	0.783738	1.21647e-18	-0.508015	8.10386e-07
ENTPD6	lightyellow	0.652125	1.82287e-11	0.51038	7.06238e-07
ACTA2	cyan	0.536474	1.44127e-07	-0.511576	6.585e-07
B3GALTL	cyan	-0.716737	1.7628e-14	0.508375	7.9366e-07
AZIN1	cyan	-0.799075	8.31161e-20	0.513415	5.91013e-07
PLXNA1	lightyellow	0.708314	4.84496e-14	0.51055	6.99247e-07
TMCC2	blue	0.729114	3.72805e-15	0.514707	5.4759e-07
KLK11	cyan	0.848951	1.99789e-24	-0.505645	9.29266e-07
ADIRF-AS1	darkorange	-0.745766	4.00914e-16	-0.507194	8.49855e-07
PRKAR1A	darkorange	0.854945	4.30788e-25	0.510035	7.20607e-07
TMEM30B	cyan	0.880464	2.62953e-28	-0.508774	7.75479e-07
CEACAM7	cyan	0.545323	8.15054e-08	-0.506928	8.62995e-07
AX746755 /// RP11-774O3.3	green	0.770641	1.01837e-17	-0.506186	9.00779e-07
ISYNA1	lightyellow	0.676078	1.70559e-12	0.516092	5.04379e-07
E2F1	lightyellow	0.694497	2.36026e-13	0.509554	7.41095e-07
SYNPO2	cyan	0.723204	7.91087e-15	-0.506009	9.10007e-07
TPRG1	cyan	0.862873	5.07613e-26	-0.505533	9.35238e-07
SPRY4	cyan	-0.764714	2.5452e-17	0.505643	9.29336e-07
SSBP2	darkorange	-0.656059	1.25345e-11	-0.508256	7.99179e-07
PNO1	cyan	-0.659745	8.7809e-12	0.513141	6.00646e-07
MYOCD	cyan	0.623373	2.4026e-10	-0.506088	9.05852e-07
BCL11B	cyan	0.836529	3.92634e-23	-0.505075	9.60224e-07
RP11-676J12.6	cyan	0.551658	5.36477e-08	-0.50659	8.80037e-07
CYP2W1	darkorange	-0.625553	1.9942e-10	-0.516455	4.93602e-07
RP11-774O3.3	green	0.803503	3.66728e-20	-0.50745	8.37376e-07
BPGM	blue	0.538255	1.28675e-07	0.510144	7.16016e-07
CYB561D1	green	0.730357	3.17463e-15	-0.509902	7.26227e-07
DCLRE1B	lightyellow	0.544519	8.58961e-08	0.511396	6.65492e-07
ITGA9-AS1	blue	-0.519304	4.1627e-07	-0.511398	6.65401e-07
KLB	cyan	0.738912	1.02466e-15	-0.504979	9.65509e-07
MELK	midnightblue	0.876909	8.12195e-28	0.506093	9.05615e-07
LOC285419	salmon	0.593621	2.66149e-09	-0.507015	8.58662e-07
ATP6V0E2-AS1	salmon	-0.622317	2.62815e-10	0.506271	8.9634e-07
LOC101927278	blue	0.600929	1.50829e-09	0.508872	7.71076e-07
PRRG2	cyan	0.764731	2.53858e-17	-0.509394	7.48029e-07
GABRA4	green	0.894526	2.0762e-30	-0.504438	9.95932e-07
SIAH1	blue	0.548236	6.73178e-08	0.517965	4.51062e-07
TEAD3	cyan	0.722163	9.01305e-15	-0.506609	8.79062e-07
EGR3	cyan	0.613481	5.496e-10	-0.505429	9.40868e-07
OSBPL6	cyan	0.558826	3.30678e-08	-0.505093	9.59203e-07
LMO1	cyan	0.752724	1.49939e-16	-0.507919	8.14901e-07
SPATA18	cyan	0.773407	6.57845e-18	-0.507008	8.59011e-07
APPBP2	darkorange	0.766851	1.83487e-17	0.512531	6.22589e-07
MXRA5	cyan	0.692764	2.86101e-13	-0.505467	9.38791e-07
SLC31A2	cyan	0.748192	2.8559e-16	-0.505419	9.41381e-07
C3AR1	yellow	0.752672	1.51069e-16	0.50543	9.40814e-07
PLXDC2	cyan	0.790465	3.8541e-19	-0.50526	9.50023e-07
EPOR	lightyellow	0.676443	1.64228e-12	0.50807	8.07845e-07
EFCAB1	cyan	0.626987	1.76285e-10	-0.505854	9.18161e-07
WFDC21P	cyan	0.829637	1.84451e-22	-0.503584	1.04583e-06
ACP5	lightyellow	0.690004	3.87559e-13	0.505567	9.3343e-07
DERL1	darkorange	0.787862	6.04264e-19	0.509941	7.24572e-07
LOC101926907	green	0.888188	1.99399e-29	-0.503583	1.04589e-06
AOX1	cyan	0.643012	4.25106e-11	-0.504147	1.01265e-06
CYP2B7P	green	0.606694	9.53813e-10	-0.504854	9.72433e-07
LAMA5	darkorange	-0.660622	8.06181e-12	-0.505113	9.58131e-07
CSNK1D	lightyellow	0.732818	2.30332e-15	0.511018	6.80377e-07
SNORD114-3	white	0.648061	2.66853e-11	-0.506007	9.10072e-07
GRB10	lightyellow	0.602595	1.32249e-09	0.505021	9.63194e-07
CDC14B	blue	0.528853	2.32454e-07	0.510962	6.82595e-07
KRTAP9-8	darkgreen	0.935546	8.13224e-39	-0.502291	1.12585e-06
ZNF200	greenyellow	0.729017	3.77485e-15	0.507936	8.14109e-07
MUCL1	cyan	0.824247	5.89798e-22	-0.502001	1.1446e-06
CPN1	blue	0.763817	2.91665e-17	0.502094	1.13851e-06
MIR205	cyan	0.851439	1.06564e-24	-0.50272	1.09867e-06
LMO7	blue	-0.533594	1.72906e-07	-0.524805	2.98237e-07
CDON	blue	-0.504352	1.00088e-06	-0.5094	7.47747e-07
SPSB1	blue	0.667138	4.23556e-12	0.505792	9.21439e-07
PPEF1	blue	0.611884	6.26484e-10	0.502503	1.11235e-06
PALMD	cyan	0.715818	1.97203e-14	-0.502354	1.12185e-06
CPE	cyan	0.571107	1.40485e-08	-0.503744	1.03631e-06
PLCXD3	blue	-0.573961	1.14563e-08	-0.503787	1.03376e-06
MAD2L2	lightyellow	0.818566	1.92542e-21	0.504005	1.02095e-06
DPY19L2P2	blue	0.678201	1.36793e-12	0.50239	1.11954e-06
RP11-506O24.2	white	0.666904	4.33604e-12	-0.503852	1.0299e-06
ACTC1	cyan	0.546828	7.38527e-08	-0.501476	1.1792e-06
LRRC59	lightyellow	0.592396	2.92335e-09	0.509186	7.57125e-07
LOC101927792	blue	0.553619	4.7049e-08	0.514933	5.403e-07
CKB	cyan	0.742937	5.92675e-16	-0.502191	1.13226e-06
GNG5	lightyellow	0.635799	8.14697e-11	0.534367	1.64685e-07
FAT2	cyan	0.87147	4.27144e-27	-0.501368	1.1865e-06
OPN3	blue	0.715781	1.98088e-14	0.503499	1.05092e-06
ZCCHC3	lightyellow	0.572875	1.23836e-08	0.506788	8.7001e-07
C6	cyan	0.535491	1.53399e-07	-0.503049	1.07828e-06
TRHDE-AS1	green	0.868557	1.00739e-26	-0.501152	1.20111e-06
PIEZO1	blue	-0.551151	5.54918e-08	-0.516344	4.96871e-07
GHDC	lightyellow	0.753292	1.38176e-16	0.504948	9.67211e-07
ALOX12P2	cyan	0.61645	4.30017e-10	-0.503056	1.07783e-06
EXO1	midnightblue	0.795258	1.65559e-19	0.50195	1.14791e-06
SSTR1	darkgreen	0.841915	1.11403e-23	-0.507813	8.19966e-07
LOC285095	green	0.6984	1.52283e-13	-0.514114	5.67134e-07
RXRG	blue	0.726122	5.46928e-15	0.500087	1.27579e-06
CUTA	lightyellow	0.798054	1.00072e-19	0.517044	4.76579e-07
RAB33A	yellow	0.517925	4.52139e-07	0.500759	1.22817e-06
KLC3	cyan	0.76693	1.81261e-17	-0.504431	9.96325e-07
MAMDC2	cyan	0.598323	1.84983e-09	-0.50011	1.27413e-06
XKRX	cyan	0.83262	9.52396e-23	-0.500422	1.25182e-06
PNPT1	greenyellow	0.769349	1.2463e-17	0.502338	1.12287e-06
USP51	blue	0.686421	5.71881e-13	0.501922	1.14975e-06
FAM69C	lightyellow	0.569159	1.61287e-08	0.501072	1.20655e-06
EID2B	cyan	-0.555265	4.21141e-08	0.501226	1.19611e-06
ACTA1	cyan	0.517925	4.52153e-07	-0.500259	1.26343e-06
ELMO3	cyan	0.8741	1.93259e-27	-0.501031	1.20936e-06
MUC20	blue	-0.594488	2.48992e-09	-0.502542	1.10989e-06
TMEM206	cyan	-0.697307	1.72281e-13	0.50346	1.05324e-06
FZD9	blue	0.607695	8.80047e-10	0.504211	1.00898e-06
FOXN2	green	-0.747639	3.08656e-16	0.505037	9.6231e-07
LRP8	midnightblue	0.692899	2.8185e-13	0.502418	1.11775e-06
SEMA4G	cyan	0.801431	5.39181e-20	-0.501045	1.2084e-06
SNX30	blue	0.665208	5.13412e-12	0.50533	9.46244e-07
CPSF3	greenyellow	0.79638	1.35412e-19	0.509567	7.40532e-07
SP110	yellow	0.543385	9.2472e-08	0.501047	1.2083e-06
INF2	lightyellow	0.581024	6.85664e-09	0.503945	1.02447e-06
LILRB4	yellow	0.82352	6.87788e-22	0.500987	1.21237e-06
AK4 /// LOC100507855	cyan	0.589376	3.67785e-09	-0.50048	1.24773e-06
MTFP1	lightyellow	0.803202	3.87895e-20	0.501278	1.19253e-06
CRIM1 /// LOC101929500	lightyellow	-0.738661	1.05978e-15	-0.503005	1.08099e-06
LOC102724362	cyan	0.763089	3.25645e-17	-0.50056	1.24208e-06
ST3GAL6	cyan	-0.785661	8.79557e-19	0.500075	1.2766e-06
DYRK2	blue	0.521641	3.61534e-07	0.504015	1.02037e-06
RNF166	saddlebrown	0.734391	1.87264e-15	0.504808	9.75051e-07
INPP4A	darkorange	0.592706	2.85471e-09	0.506096	9.05457e-07
LINC00853	blue	0.616961	4.12138e-10	0.502648	1.10317e-06
NUCB1	lightyellow	0.756626	8.51424e-17	0.50128	1.19245e-06
CIAPIN1	lightyellow	0.737778	1.19337e-15	0.503091	1.07565e-06
SMCHD1	cyan	-0.542421	9.84408e-08	0.501417	1.18321e-06
HSD17B7	lightyellow	-0.514718	5.47221e-07	-0.509975	7.23109e-07
NKPD1	cyan	0.759527	5.55169e-17	-0.503117	1.07406e-06
TMEM231	blue	0.604495	1.13721e-09	0.501851	1.15437e-06
OSBPL2	green	0.798085	9.95198e-20	-0.505049	9.61631e-07
NME1	lightyellow	0.806773	1.97708e-20	0.501511	1.17691e-06
KIAA1217	cyan	0.589061	3.76639e-09	-0.500232	1.26531e-06
TECPR1	lightyellow	0.574575	1.09617e-08	0.510707	6.92882e-07
DLG3	cyan	0.613431	5.51859e-10	-0.500657	1.23525e-06
NEB	cyan	0.62169	2.77162e-10	-0.50285	1.09053e-06
ATOX1	lightyellow	0.816682	2.82434e-21	0.502522	1.11112e-06
RTN3	green	0.690254	3.77096e-13	-0.505755	9.23397e-07
PSME3	lightyellow	0.675378	1.83374e-12	0.502831	1.09172e-06
TMEM173	saddlebrown	0.701779	1.03618e-13	0.506659	8.76527e-07
GABPB2	blue	-0.682135	9.04369e-13	-0.501531	1.17554e-06
ASB7	darkorange	0.661713	7.2463e-12	0.514091	5.67885e-07
ZKSCAN5	blue	0.657334	1.10889e-11	0.5045	9.92427e-07
ING1	cyan	-0.65735	1.10716e-11	0.505343	9.45523e-07
FAM182A /// FAM182B /// FAM27B /// FAM27C	cyan	0.649343	2.36779e-11	-0.500598	1.2394e-06
RXRA	cyan	0.851632	1.0143e-24	-0.500214	1.26662e-06
WSCD2	cyan	0.632306	1.1095e-10	-0.501591	1.17154e-06
NUBP1	lightyellow	0.722927	8.19019e-15	0.505101	9.58771e-07
BCL2	blue	0.544295	8.71613e-08	0.507376	8.40947e-07
SDS	lightyellow	0.661842	7.15522e-12	0.501401	1.18425e-06
TNFRSF18	cyan	0.620833	2.97952e-10	-0.500301	1.2604e-06
C20orf27	lightyellow	0.81189	7.34295e-21	0.500048	1.27855e-06
FUT11	blue	0.53266	1.83347e-07	0.504098	1.01549e-06
CMTM1	blue	0.586996	4.40016e-09	0.511162	6.74675e-07
CD99L2	darkorange	0.697252	1.73364e-13	0.503836	1.03083e-06
LANCL2	blue	0.566283	1.9746e-08	0.502331	1.1233e-06
GTF3C6	blue	0.585371	4.96922e-09	0.504811	9.74859e-07
GYG1	darkorange	0.667414	4.12027e-12	0.505045	9.61854e-07
FAM65A	lightyellow	0.688669	4.48293e-13	0.500278	1.26205e-06
FAM13B	cyan	-0.617677	3.88287e-10	0.500669	1.23443e-06
LOC100507670	lightyellow	0.582429	6.18243e-09	0.500603	1.23907e-06
PWP1	cyan	-0.744616	4.70262e-16	0.500638	1.23661e-06
PDZD11	lightyellow	0.657563	1.08469e-11	0.506356	8.9197e-07
STX2	cyan	-0.738183	1.13026e-15	0.501526	1.17591e-06
FANCF	darkorange	0.641723	4.78097e-11	0.501207	1.19736e-06
ZNF622	lightyellow	0.715409	2.07243e-14	0.500591	1.23988e-06
PPP1CB	lightyellow	-0.605151	1.07928e-09	-0.506948	8.62006e-07
LUZP6 /// MTPN	darkorange	0.779253	2.55977e-18	0.504325	1.00238e-06
RABGAP1	blue	-0.616655	4.2275e-10	-0.500016	1.28091e-06
